# Growth Arrest and DNA-damage-inducible Protein 45 $\beta$ -mediated DNA Demethylation of *Voltage-dependent T-type Calcium Channel 3.2 Subunit* Enhances Neuropathic Allodynia after Nerve Injury in Rats

Cheng-Yuan Lai, B.S., Ming-Chun Hsieh, M.Sc., Yu-Cheng Ho, Ph.D., An-Sheng Lee, Ph.D., Hsueh-Hsiao Wang, Ph.D., Jen-Kun Cheng, M.D., Ph.D., Yat-Pang Chau, Ph.D., Hsien-Yu Peng, Ph.D.

## ABSTRACT

**Background:** Growth arrest and DNA-damage-inducible protein 45 $\beta$  reactivates methylation-silenced neural plasticity-associated genes through DNA demethylation. However, growth arrest and DNA-damage-inducible protein 45 $\beta$ -dependent demethylation contributes to neuropathic allodynia-associated spinal plasticity remains unclear.

**Methods:** Adult male Sprague–Dawley rats (654 out of 659) received a spinal nerve ligation or a sham operation with or without intrathecal application of one of the following: *growth arrest and DNA-damage-inducible protein 45 $\beta$  messenger RNA*-targeted small interfering RNA, lentiviral vector expressing *growth arrest and DNA-damage-inducible protein 45 $\beta$* , Ro 25–6981 (an NR2B-bearing *N*-methyl-D-aspartate receptor antagonist), or KN-93 (a calmodulin-dependent protein kinase II antagonist) were used for behavioral measurements, Western blotting, immunofluorescence, dot blots, detection of unmodified cytosine enrichment at cytosine-phosphate-guanine site, chromatin immunoprecipitation quantitative polymerase chain reaction analysis, and slice recordings.

**Results:** Nerve ligation-enhanced growth arrest and DNA-damage-inducible protein 45 $\beta$  expression ( $n = 6$ ) in ipsilateral dorsal horn neurons accompanied with behavioral allodynia ( $n = 7$ ). Focal knockdown of growth arrest and DNA-damage-inducible protein 45 $\beta$  expression attenuated ligation-induced allodynia ( $n = 7$ ) by reducing the binding of growth arrest and DNA-damage-inducible protein 45 $\beta$  to the *voltage-dependent T-type calcium channel 3.2 subunit* promoter ( $n = 6$ ) that decreased expression of and current mediated by the *voltage-dependent T-type calcium channel 3.2 subunit* (both  $n = 6$ ). In addition, NR2B-bearing *N*-methyl-D-aspartate receptors and calmodulin-dependent protein kinase II act in an upstream cascade to increase growth arrest and DNA-damage-inducible protein 45 $\beta$  expression, hence enhancing demethylation at the *voltage-dependent T-type calcium channel 3.2 subunit* promoter and up-regulating *voltage-dependent T-type calcium channel 3.2 subunit* expression. Intrathecal administration of Ro 25–6981, KN-93, or a growth arrest and DNA-damage-inducible protein 45 $\beta$ -targeting small interfering RNA ( $n = 6$ ) reversed the ligation-induced enrichment of unmodified cytosine at the *voltage-dependent T-type calcium channel 3.2 subunit* promoter by increasing the associated 5-formylcytosine and 5-carboxylcytosine levels.

**Conclusions:** By converting 5-formylcytosine or 5-carboxylcytosine to unmodified cytosine, the NR2B-bearing *N*-methyl-D-aspartate receptor, calmodulin-dependent protein kinase II, or growth arrest and DNA-damage-inducible protein 45 $\beta$  pathway facilitates *voltage-dependent T-type calcium channel 3.2 subunit* gene demethylation to mediate neuropathic allodynia. (ANESTHESIOLOGY 2017; 126:1077-95)

DNA methylation is an epigenetic modification essential for gene silencing and genome stability. Growth arrest and DNA-damage-inducible protein 45 (Gadd45) is known to relieve methylation-induced gene silencing by promoting DNA demethylation, which erases or changes the DNA methylation state of cytosine-phosphate-guanine (CpG) dinucleotides at genomic loci.<sup>1</sup> Among the Gadd45 family members,<sup>2</sup> a growing body of evidence has implicated Gadd45 $\beta$  as a crucial mediator of activity-induced gene-specific demethylation in the central nervous system (CNS).<sup>3</sup> Intriguingly, Gadd45 $\beta$  is known to be required for specifically promoting DNA demethylation or hypomethylation<sup>3,4</sup> and the accompanying transcriptional activation<sup>1,5</sup> of target genes that are essential for forms of spinal plasticity-dependent neuropathic pain.<sup>6,7</sup> Hypomethylated CpG sites

### What We Already Know about This Topic

- The methylation of DNA cytosine residues reduces the expression of nearby genes
- Growth arrest and DNA-damage-inducible protein 45 $\beta$  promotes the demethylation of DNA and the expression of pain-related genes

### What This Article Tells Us That Is New

- The ligation of nerves in the rat hind limb both caused nociceptive sensitization and expression of growth arrest and DNA-damage-inducible protein 45 $\beta$  (Gadd45 $\beta$ ) in spinal cord tissue
- The abundance of Gadd45 $\beta$  controlled the expression of the calcium ion channel *voltage-dependent T-type calcium channel 3.2 subunit* through demethylation, which in turn appeared to modulate nociceptive sensitization

in the *voltage-dependent T-type calcium channel 3.2 subunit* (Ca $_v$ 3.2) gene are essential for Ca $_v$ 3.2 transcription.<sup>8</sup> Ca $_v$ 3.2 in lamina II and III of the dorsal horn are molecular substrates of neuropathic allodynia.<sup>9</sup> Therefore, the activation of Gadd45 $\beta$ -mediated DNA demethylation, which is required to reactivate the methylation-silenced Ca $_v$ 3.2 gene, likely represents one of the mechanisms underlying the modulation of spinal plasticity-dependent neuropathic allodynia.

A landmark study showed the application of an *N*-methyl-D-aspartate receptor (NMDAR) agonist activates calmodulin-dependent protein kinase (CaMK), which up-regulates Gadd45 $\beta$  expression, enhances Gadd45 $\beta$ -mediated DNA demethylation, and subsequently induces neural plasticity-related gene transcription in the mammalian brain.<sup>5</sup> Conversely, transfection of cultured neurons with Gadd45 $\beta$  small interfering RNA (siRNA) abolishes NMDAR agonist-induced DNA demethylation of the target gene.<sup>10</sup> The NMDAR agonist-dependent up-regulation of Gadd45 expression in the rat retina was blocked by a calmodulin-dependent protein kinase II (CaMKII)-specific inhibitor.<sup>11</sup> In addition, several *in vivo* studies showed that impaired spinal NR2B-containing NMDAR or CaMKII signaling attenuates nociceptive responses,<sup>12,13</sup> and our previous study demonstrated that experimental neuropathic injury enhances NR2B-containing NMDAR phosphorylation in the dorsal horn.<sup>14</sup> This evidence suggests that Gadd45 $\beta$ -dependent DNA demethylation of target genes underlies NR2B or CaMKII signaling-mediated neural activity or plasticity in the development of neuropathic allodynia. Furthermore, recent work demonstrated that Ca $_v$ 3.2 is associated with NMDAR-mediated transmission at rat central synapses<sup>15</sup> and regulated by CaMKII to enhance neuronal excitability.<sup>16</sup> Moreover, Ca $^{2+}$ -dependent CaMKII signaling regulates the transcription of Ca $^{2+}$  channels.<sup>17</sup> These observations prompted us to hypothesize that the activation of CaMKII by spinal NR2B-NMDAR phosphorylation contributes to the development of neuropathic allodynia through Gadd45 $\beta$ -mediated Ca $_v$ 3.2 gene demethylation.

DNA in most mammalian cells displays relatively stable methylation patterns, with 70 to 80% methylated CpG dinucleotides.<sup>18</sup> The active demethylation pathway, which initiates gene transcription, involves the hydroxylation of the methyl group (5-hmC) of methylated cytosine (5-mC), the further oxidation of 5-hmC into 5-formylcytosine and/or 5-carboxylcytosine, and the restoration of unmodified 5-cytosine *via* nucleotide-excision repair.<sup>19–21</sup> Intriguingly,

spinal 5-hmC significantly increases in a model of formalin-induced acute inflammatory pain.<sup>22</sup> Moreover, recent data suggest Gadd45 $\beta$  facilitates active DNA demethylation by catalyzing the substitution of 5-mC with unmodified cytosine.<sup>23</sup> Furthermore, Gadd45 has been shown to excise intermediates of 5-mC demethylation, such as 5-formylcytosine and 5-carboxylcytosine, resulting in reversion to unmodified cytosine to complete the active demethylation process.<sup>24</sup> Therefore, we hypothesized that the role of spinal Gadd45 $\beta$  in demethylating the Ca $_v$ 3.2 promoter through the removal of 5-formylcytosine and/or 5-carboxylcytosine in favor of unmodified cytosine underlies NR2B-containing NMDAR or CaMKII signaling in spinal nerve ligation (SNL)-induced neuropathic allodynia.

## Materials and Methods

### Animal Preparations

All animal procedures in this study were conducted in accordance with the guidelines of the International Association for the Study of Pain (Washington, DC)<sup>25</sup> and were reviewed and approved by the Institutional Review Board of Taipei Medical University, Taipei, Taiwan. Adult male Sprague-Dawley rats weighing 200 to 250 g were housed at room temperature (23 ± 1°C) with a 12-h light–dark cycle (lights on 8:00 AM to 8:00 PM) and were fed food and water *ad libitum*. Animals were randomly allocated to treatment groups using a Research Randomizer (a randomizer on the Web site <https://www.randomizer.org/>) and the sample size of each group was based on our previous experience. In each group, there were seven rats used for behavioral test and immunohistochemistry, five rats for quantitative reverse-transcription polymerase chain reaction (PCR), and six rats for the Western blot, chromatin immunoprecipitation (ChIP) quantitative PCR, electrophysiologic analysis, dot blot analysis, and measurement of 5-cytosine levels at CpG sites on the Ca $_v$ 3.2 promoter; the investigators were blinded to the treatment groups for all experiments.

### Spinal Nerve Ligation

Spinal nerve ligation rat model was performed as described by previous studies.<sup>26</sup> In brief, rats were deeply anesthetized with isoflurane (5% induction and 2% maintenance in air) and were placed in a prone position. After making an incision, the left L5–L6 spinal nerves were carefully dissected and tightly ligated with 6-0 silk sutures 2 to 5 mm distal to the dorsal root ganglia. After ligation, the incision on the animal was closed. In the sham-operated group, the surgical procedures were identical to the nerve ligation group, except the silk sutures were left unligated.

### Intrathecal Catheter

Implantation of intrathecal cannulae was performed as described in our previous study.<sup>27,28</sup> Under anesthesia with isoflurane (5% induction and 2% maintenance in air),

C.-Y.L. and M.-C.H. contributed equally to this study.

Submitted for publication July 11, 2016. Accepted for publication February 1, 2017. From the Department of Veterinary Medicine, College of Veterinary Medicine, National Chung-Hsing University, Taichung, Taiwan (C.-Y.L.); Department of Medicine, Mackay Medical College, New Taipei, Taiwan (C.-Y.L., M.-C.H., Y.-C.H., A.-S.L., H.-H.W., J.-K.C., Y.-P.C., H.-Y.P.); Department of Physiology, College of Medicine, National Taiwan University, Taipei, Taiwan (M.-C.H.); and Department of Anesthesiology, Mackay Memorial Hospital, Taipei, Taiwan (J.-K.C.).

PE-10 silastic tubing was implanted in the lumbar enlargement of the spinal cord. The outer part of the catheter was plugged and immobilized onto the skin on closure of the wound. Five rats that displayed neurologic deficits after surgery were euthanized and excluded from statistical analyses.

### Behavioral Studies

Tactile sensitivity was assessed by measuring each rat's paw withdrawal threshold in response to probing with von Frey monofilaments (Stoelting, USA) according to a modification of a previously described method.<sup>29</sup> In brief, rats were placed individually in an opaque plastic cylinder, which was placed on a wire mesh. The animals were habituated for 1 h to allow acclimatization to the test environment before each test. After acclimatization, calibrated von Frey filaments of incremental stiffness (0.07 to 26.0 g) were applied serially to the paw in ascending or descending order of stiffness depending on the foot-withdrawal response of the rat. Each trial of stimuli consisted of five applications of the filament every 4 s to the plantar surface of the left hind paw perpendicularly for approximately 3 to 4 s. Brisk foot withdrawals (at least three out of five times the filament was applied) in response to normally innocuous mechanical stimuli using von Frey filaments were considered positive; a lack of response was considered negative. Depending on the positive or negative response, subsequent filaments were applied in order of descending and ascending intensity, respectively. Motor function was assessed using an accelerating rotarod apparatus (LE8500; Ugo Basile, Italy). For acclimatization, the animals were subjected to three training trials at 3- to 4-h intervals on 2 separate days. During the training sessions, the rod was set to accelerate from 3 to 30 rpm over a 180-s period. During the test session, the performance times of rats were recorded up to a cutoff time of 180 s. Three measurements were obtained at intervals of 5 min and were averaged for each test.

### Locomotor Activity

The open field test was conducted to determine whether SNL and the additional treatments affect locomotor activity in rats. Each rat was placed in the center of a black arena (50 cm × 50 cm, 40 cm high). A video camera system was used to record the rats' activity for 30 min. Locomotor activity including the traveling distance (centimeters), rears duration, and number of rears was analyzed using EthoVision XT tracking software (Noldus Information Technology, The Netherlands).

### Western Blotting

The dissected dorsal horn (L4–L5) and dorsal root ganglion (DRG; L4–L5) sample were homogenized in 25 mM Tris-hydrochloride, 150 mM NaCl, 1% Tergitol-type NP-40, 1% sodium deoxycholate, and 0.1% sodium dodecyl sulfate with a complete protease inhibitor mixture (Roche, Germany). After incubation on ice (1 h), the lysates were centrifuged

(14,000 rpm, 20 min, 4°C). All the protein concentrations were determined using a bicinchoninic acid assay. The supernatant was separated on an acrylamide gel and transferred to a polyvinylidene difluoride membrane, which was then incubated (1 h, room temperature) in either rabbit anti-Gadd45β (1:1,000; Santa Cruz Biotechnology, USA), rabbit anti-Ca<sub>v</sub>3.2 (1:1,000; Santa Cruz Biotechnology), rabbit anti-phosphorylated NR2B (pNR2B; 1:1,000; Millipore, USA), rabbit anti-phosphorylated CaMKII (pCaMKII; 1:1,000; Sigma-Aldrich, China), or mouse anti-glyceraldehyde 3-phosphate dehydrogenase (GAPDH; 1:4,000; Santa Cruz Biotechnology). The blots were washed and incubated (1 h, room temperature) in peroxidase-conjugated goat anti-rabbit immunoglobulin G (IgG; 1:8,000; Jackson ImmunoResearch, USA) or goat anti-mouse IgG (1:8,000; Jackson ImmunoResearch). The protein bands were visualized using an enhanced chemiluminescence detection kit (ECL Plus; Millipore) and then subjected to a densitometric analysis with Science Lab 2003 (Fuji, Japan).

### Immunofluorescence

After perfusion (100 ml phosphate buffered saline [PBS] followed by 300 ml paraformaldehyde, 4%, in PBS, pH 7.4), the spinal cord samples were harvested (L4–L5), postfixed (4°C for 4 h), and cryoprotected overnight in sucrose solution (30%). The samples were double labeled to investigate the interactions between Gadd45β and neuronal, glial, or microglia markers; specifically, the spinal sections were incubated overnight (4°C) with a mixture of rabbit anti-Gadd45β (1:100; Santa Cruz Biotechnology) and mouse monoclonal antineuronal nuclear antigen (a neuronal marker; 1:500; Millipore), mouse antiglial fibrillary acidic protein (a marker of astroglial cells; 1:1,000; Millipore), or mouse antiintegrin αM (OX-42, a marker of microglia; 1:1,000; Santa Cruz Biotechnology). After three rinses with PBS, the sections were then incubated (1 h, 37°C) with Alexa Fluor 488 (1:1,500; Invitrogen, USA) and Alexa Fluor 594 (1:1,500; Invitrogen). When examining the interaction among Gadd45β, pNR2B, and pCaMKII, the specific antibodies were mixed with ×10 reaction buffer (Mix-n-Stain; Biotium, USA) with the antibody solution at a ratio of 1:10. The solution was then transferred to a vial containing dye (CF; Biotium) and incubated in the dark (30 min, room temperature). The spinal cord sections were sequentially incubated (overnight, 4°C) with diluted solutions—*i.e.*, rabbit anti-Gadd45β (1:100; Santa Cruz Biotechnology), rabbit anti-pNR2B (1:200; Biorbyt, USA), and rabbit anti-pCaMKII (1:100; Santa Cruz Biotechnology)—and were washed five times between each incubation. Spinal sections were subsequently rinsed in PBS, and coverslips were applied. When these fluorescent markers are excited, they can easily be detected using a camera-coupled device (X-plorer; Diagnostic Instruments, Inc., USA) using fluorescence microscopy (LEICA DM2500, Germany). For quantity measurement of immunofluorescent intensity, cell counting in the superficial dorsal horn (lamina II) was



carried out under a microscope at a magnification of  $\times 200$ . Five sections from each spinal cord were selected, and seven animals were analyzed in each group. Images were analyzed with ImageJ software (National Institutes of Health, USA).

### Dot Blot Analysis

The global levels of 5-formylcytosine and 5-carboxylcytosine were assessed using the dot blot analysis. The dissected dorsal horn (L4–L5) was collected and grounded in liquid nitrogen and stored at  $-80^{\circ}\text{C}$ . After genomic DNA extraction from tissues using a DNA extraction kit (Qiagen, Germany), the isolated DNA (100 ng per sample) was denatured in 0.1 M NaOH for 10 min at  $95^{\circ}\text{C}$  and then neutralized with 1 M  $\text{NH}_4\text{OAc}$  on ice. Labeled samples were spotted on a positively charged nitrocellulose membrane, which was air-dried at room temperature. After ultraviolet cross-linking at  $120,000 \mu\text{J}/\text{cm}^2$  for 30 s, the membrane was blocked with 5% milk at room temperature for 1 h. After washing, the membrane was incubated with the primary antibody, *i.e.*, rabbit anti-5-formylcytosine (1:5,000; ActiveMotif, USA) or rabbit anti-5-carboxylcytosine (1:2,000; ActiveMotif) at  $4^{\circ}\text{C}$  overnight. After incubating with primary antibody, the membrane was washed and incubated in goat anti-rabbit IgG (1:8,000; Jackson ImmunoResearch) for 1 h at room temperature. The blots were visualized using an enhanced chemiluminescence detection kit (ECL Plus; Millipore) and then subjected to densitometric analysis using Science Lab 2003 (Fuji).

### Methylene Blue Staining

The dot blot membrane was hybridized with 0.02% methylene blue in 0.3 sodium acetate (pH 5.2) to stain DNA for 10 min. After washing and taking photographs, densitometric analysis of the methylene blue staining was performed with Science Lab 2003 (Fuji) to validate equal DNA loading.

### Quantitative Reverse-transcription Polymerase Chain Reaction

In brief, the dissected dorsal horn (L4–L5) and DRG (L4–L5) were quickly removed and completely submerged in a sufficient volume of RNAlater solution (AM7021; Ambion, USA) overnight at  $4^{\circ}\text{C}$  to allow thorough penetration of the tissue and then transferred to  $80^{\circ}\text{C}$ . Total RNA was isolated under ribonuclease-free conditions using RNA isolation kits (74106; Qiagen, USA). Reverse transcription was performed using complementary DNA reverse-transcription kits (205311; Qiagen, USA). Real-time PCR was performed on a 7500 Real-Time PCR System (Applied Biosystems, USA). TaqMan Universal PCR Master Mix (2 $\times$ ) and TaqMan gene expression assay probes for target genes were GAPDH (Rn999999916\_s1; Applied Biosystems) and Ca $_v$ 3.2 (Rn.PT.58.44897351; IDT, USA). Reactions (total volume, 20  $\mu\text{l}$ ) were performed by incubating at  $95^{\circ}\text{C}$  for 20 s, followed by 40 cycles of 1 s at  $95^{\circ}\text{C}$  and 20 s at  $60^{\circ}\text{C}$ . Relative messenger RNA (mRNA) levels were calculated according to the  $2^{-\Delta\Delta\text{CT}}$  method.<sup>30</sup> All CT values were normalized to GAPDH.

### Measurement of 5-Cytosine Levels at CpG Sites on the Ca $_v$ 3.2 Promoter

The dissected spinal cord (L4–L5) was collected, grounded in liquid nitrogen, and stored at  $-80^{\circ}\text{C}$ . Genomic DNA was extracted using a DNA extraction kit (Qiagen, Germany). Purification of 5-cytosine-enriched DNA fragments was performed using the UnMethylCollector Kit (ActiveMotif). After purification, samples were prepared for quantitative reverse-transcription polymerase chain reaction using Power SYBR Green (Applied Biosystems) on an Applied Biosystems<sup>®</sup> StepOne machine (Applied Biosystems). Data are presented as percent input, which is calculated as  $100 \times 2^{-\Delta\text{Ct}}$ , where  $\Delta\text{Ct}$  is the average Ct value of the triplicate input minus the average Ct value of the triplicate sample. The primers used to amplify the Ca $_v$ 3.2 promoter were as follows: 5'-GAGAGAGGGCAGGAGGTGAC-3' and 5'-TGGGACCCTTTGAACTTGAG-3'.

### Chromatin Immunoprecipitation Quantitative Polymerase Chain Reaction

Chromatin immunoprecipitation was performed using a ChIP Kit (Millipore) according to a modified protocol from the manufacturer. Dissected spinal cord samples were cut into small pieces (1 to 2 mm<sup>3</sup>) using razor blades, treated with fresh 1% paraformaldehyde in PBS buffer, and gently agitated for 10 min at room temperature to cross-link proteins to DNA. Then, the tissue was washed and resuspended in lysis buffer, and the lysates were sheared by sonication to generate chromatin fragments with an average length of 200 to 1,000 bp. One percent of the sonicated chromatin was saved as an input control for quantitative reverse-transcription polymerase chain reaction. The chromatin was then immunoprecipitated for 2 h at room temperature with rabbit anti-Gadd45 $\beta$  (1:1,000; Santa Cruz Biotechnology) or an equivalent amount of control IgG. The protein–DNA immunocomplexes were precipitated overnight using protein G magnetic beads at  $4^{\circ}\text{C}$ . After the beads were washed, they were resuspended in ChIP elution buffer, incubated with proteinase K at  $62^{\circ}\text{C}$  for 2 h, and then incubated at  $95^{\circ}\text{C}$  for 10 min to reverse the protein–DNA cross-links. ChIP signals were quantified by quantitative reverse-transcription polymerase chain reaction analysis with a 7500 Real-Time PCR System (Applied Biosystems). The ChIP primer sequences were as follows: 5'-GAGAGAGGGCAGGAGGTGAC-3' and 5'-TGGGACCCTTTGAACTTGAG-3'.

### Small Interfering RNA

The 19-nucleotide siRNA duplex used for Gadd45 $\beta$  was 5'-GAAGAGAGCAGAGGCCAAUA-3', and the missense nucleotide sequence was 5'-UGAUUUUACCCUGAAU-AUG-3'. The missense or siRNA construct was intrathecally administered using a polyethyleneimine (10  $\mu\text{l}$ ; Dharmacon, USA)-based gene-delivery system into the dorsal subarachnoid space (L4–L5) of animals through the implanted catheter (daily for 4 days).

### Preparation and Injection of Lentiviral Vectors

A rat lentiviral vector expressing *Gadd45 $\beta$*  (NM\_001008321) was purchased from a medical supplier (Applied Biological Materials Inc., Canada). To produce lentiviral particles, transfer vectors encoding *Gadd45 $\beta$* -2A-GFP or GFP alone (as a control), pMD2.G, and psPAX2 were cotransfected into 293T cells using a liposome delivery method. After 6 h of incubation, the culture medium was discarded and the cultured cells were washed twice with PBS. Culture medium containing lentiviruses was collected at 48 h after the washing, cleared by centrifugation at 300g at 4°C for 10 min and filtered through a 0.22- $\mu$ m pore size cellulose acetate filter. The lentiviruses were then concentrated by ultracentrifugation at 3,000 rpm at 4°C for 150 min. The titer was determined using a quantitative reverse-transcription polymerase chain reaction Lentivirus Titration Kit (Abm Inc., Canada). The rats received a single injection of 15  $\mu$ l of lentiviral vector expressing *Gadd45 $\beta$*  ( $2.4 \times 10^7$  U/ml) or control vector ( $2.2 \times 10^7$  U/ml) using an intrathecal catheter removed immediately after vector injection.

### Spinal Slice Preparations

Under anesthesia with isoflurane, rats underwent a laminectomy for removal of the lumbar spinal cord. The lumbar spinal cord section was placed in ice-cold dissecting solution: 234 mM sucrose, 3.6 mM KCl, 1.2 mM MgCl<sub>2</sub>, 2.5 mM CaCl<sub>2</sub>, 1.2 mM NaH<sub>2</sub>PO<sub>4</sub>, 12 mM glucose, and 25 mM NaHCO<sub>3</sub> and bubbled with 95% O<sub>2</sub>/5% CO<sub>2</sub>. After dissection, slices were equilibrated in artificial cerebrospinal fluid at room temperature for at least 1 h before recording. The artificial cerebrospinal fluid consisted of the following: 117 mM NaCl, 4.5 mM KCl, 2.5 mM CaCl<sub>2</sub>, 1.2 mM MgCl<sub>2</sub>, 1.2 mM NaH<sub>2</sub>PO<sub>4</sub>, 25 mM NaHCO<sub>3</sub>, and 11.4 mM dextrose bubbled with 95% O<sub>2</sub>/5% CO<sub>2</sub>, pH 7.4. The external solution for T-type calcium channel current recording experiments contained 140 mM tetraethylammonium-Cl, 2 mM BaCl<sub>2</sub>, 1 mM MgCl<sub>2</sub>, 2.5 mM CsCl, 10 mM HEPES, and 10 mM glucose, pH 7.3. To the external solution were also added 10  $\mu$ M bicuculline methiodide, 50  $\mu$ M nifedipine, 3  $\mu$ M  $\omega$ -conotoxin MVIIC, and 1  $\mu$ M tetrodotoxin to isolate T-type currents.<sup>31</sup> During recordings, a spinal slice was mounted in a submerged recording chamber and continuously perfused with oxygenated external solution at 3 to 4 ml/min.

### Whole Cell Patch Clamp Recordings

The lamina II of the spinal cord, which primarily gives rise to the nociceptive unmyelinated fiber,<sup>32</sup> was identified on an upright fixed-stage IR-DIC microscope (BX51WI; Olympus, Japan). The neuron in the outer region of lamina II, which was identified as the region 100 to 130  $\mu$ m from the dorsal edge of the white matter, was selected for whole cell patch clamp recordings as previously described.<sup>33,34</sup> Glass pipettes (5 to 8 M $\Omega$  resistance) were filled with an internal solution containing 110 mM Cs<sup>+</sup> gluconate, 5 mM tetraethylammonium, 5 mM QX314, 0.5 mM CaCl<sub>2</sub>, 5 mM

BAPTA, 10 mM HEPES, 5 mM MgATP, and 0.33 mM GTP-Tris, pH 7.3, 280 mOsm/l. Currents were measured in response to 400 ms voltage clamp pulses from a holding potential of -80 mV to test potentials between -80 and +60 mV. Electrophysiologic signals were acquired using an Axon setup (Molecular Devices/Axon Instruments, USA). Signals were sampled by pCLAMP 9.2 *via* an amplifier (Axopatch 200B, Molecular Devices) and an AD converter (Digidata 1322A, Molecular Devices), filtered at 2 to 5 kHz, digitized at 10 kHz, and stored for off-line analysis.

### Drug Application

Ro 25-6981 (an NR2B activation antagonist; 100 nM, 10  $\mu$ l; Tocris Bioscience, USA; intrathecal; dimethyl sulfoxide) and KN-93 (a selective CaMKII antagonist; 50 nM, 10  $\mu$ l; Tocris Bioscience; intrathecal; dimethyl sulfoxide) were intrathecally administered daily for 4 days from days 3 to 6 after SNL. L-Ascorbic acid (a selective Ca<sub>v</sub>3.2 antagonist; 10, 30, and 100  $\mu$ M, 10  $\mu$ l; Tocris Bioscience; intrathecal; dimethyl sulfoxide) was intrathecally administered by a bolus injection. A vehicle solution of the volume identical to that of the tested agents was dispensed to serve as a control.

### Data Analysis

All data in this study were analyzed using SigmaPlot 10.0 (Systat Software, USA) or Prism 6.0 (GraphPad, USA) and were expressed as mean  $\pm$  SD. A two-way ANOVA was used to assess changes in values for serial measurements over time, and a Tukey *post hoc* test was used to compare the means of groups (fig. 1A). A one-way ANOVA was used to assess changes in values for serial measurements over time, and paired two-tailed Student's *t* tests were used to compare the means of groups (fig. 1B). Statistical comparison was performed by a one-way ANOVA followed by Tukey test for *post hoc* analysis (figs. 1C and 2A). Figure 2B is the same as figure 1A. Figure 2, C and D, are the same as figure 1B. Figure 2, E and F, are the same as figure 1C. Paired two-tailed Student's *t* tests were used to compare the mean between groups in figure 2G. Figure 2H is the same as figure 1B. Figure 3A is no statistical analysis. Figure 3B–D are the same as figure 1C. Figure 4A is the same as figure 1A. Figure 4B–F are the same as figure 1C. Figure 4G is the same as figure 2G. Figure 4, H and I, are the same as figure 1C. Figure 4J is the same as figure 2G. Figure 4K is the same as figure 1C. Figure 5, A and B, are not statistical analysis. Figure 5C is the same as figure 1C. Figures 6A–D, 7A, and 8A–C are the same as figure 1C. Significance was set at  $P < 0.05$ . No statistical power calculation was conducted before our study, and the sample size selected was based on our previous experience using this design.

## Results

### Nerve Ligation Enhances *Gadd45 $\beta$* Expression in Dorsal Horn Neurons and Provokes Behavioral Allodynia

To characterize the role of spinal *Gadd45 $\beta$*  in the development of neuropathic allodynia, we first examined the

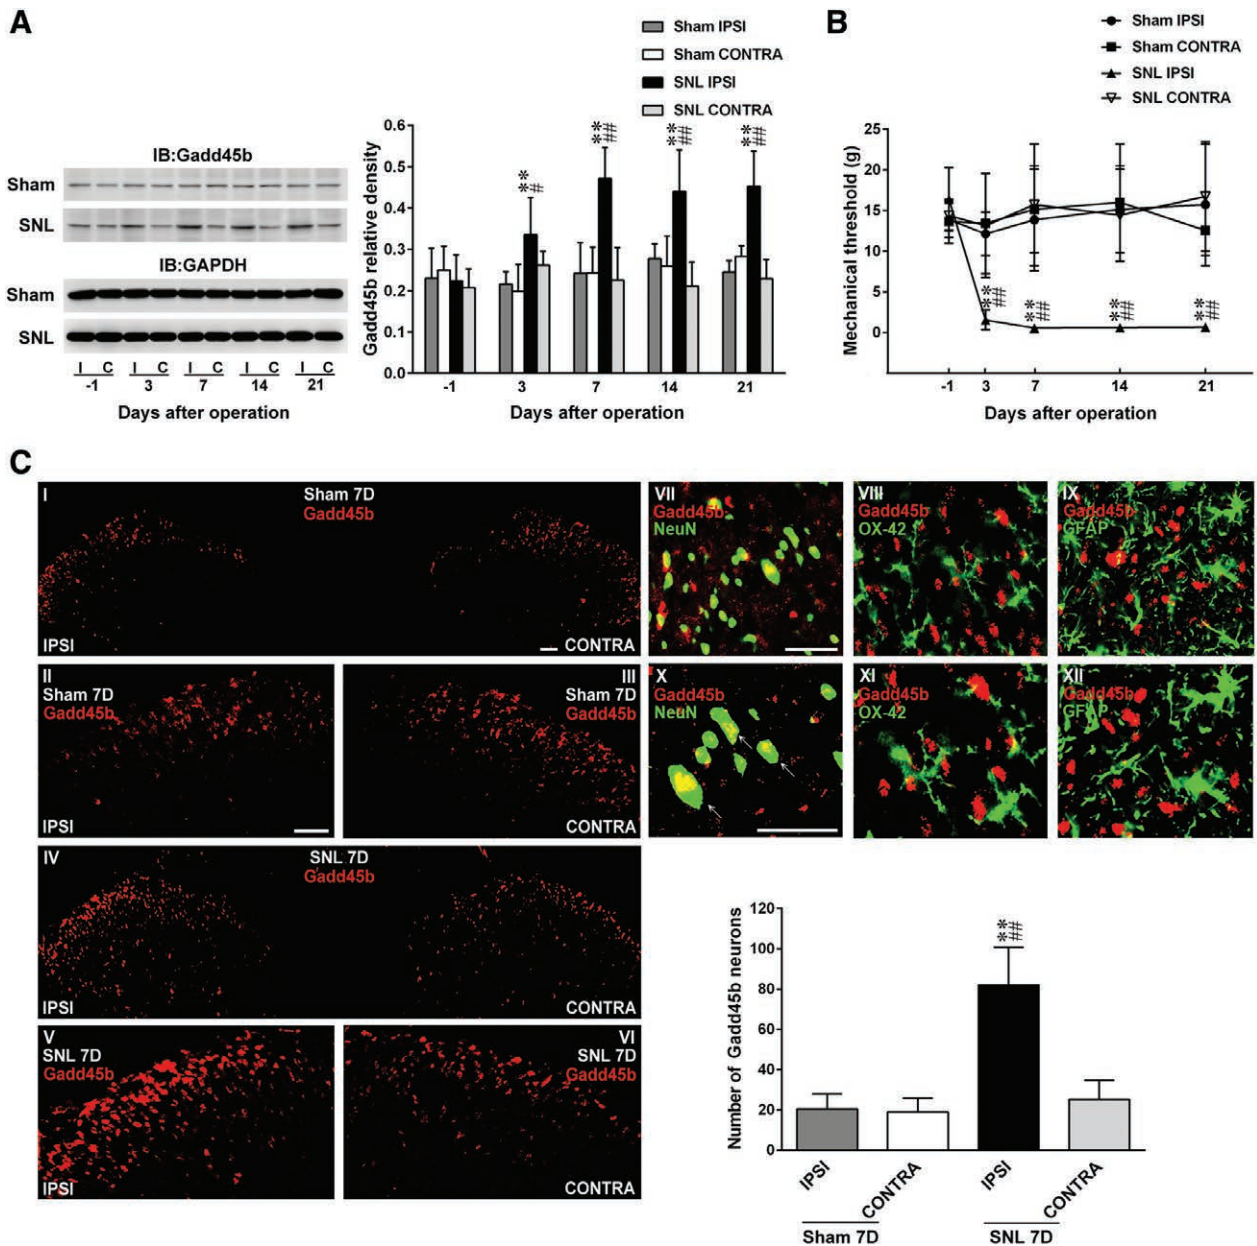

**Fig. 1.** Spinal nerve ligation (SNL) up-regulates growth arrest and DNA-damage-inducible protein 45 $\beta$  (Gadd45 $\beta$ ) expression in spinal dorsal horn neurons, accompanied by behavioral allodynia. (A) Representative Western blot and statistical analysis (normalized to glyceraldehyde 3-phosphate dehydrogenase protein [GAPDH]) revealing that whereas sham operation (Sham) exhibited no effect, SNL increased the abundance of Gadd45 $\beta$  on days 3, 7, 14, and 21 postoperation specifically in the ipsilateral (I and IPSI), but not the contralateral (C and CONTRA), dorsal horn.  $^{**}P < 0.01$  versus Sham IPSI.  $^{#}P < 0.05$ .  $^{###}P < 0.01$  versus SNL day -1.  $n = 6$ . (B) The withdrawal threshold of the ipsilateral (SNL IPSI), but not the contralateral (SNL CONTRA), hind paw decreased on days 3, 7, 14, and 21 after SNL (von Frey test).  $^{**}P < 0.01$  versus Sham IPSI.  $^{###}P < 0.01$  versus SNL day -1.  $n = 7$ . (C) In the ipsilateral dorsal horn (IPSI), SNL (SNL 7D) increased the immunofluorescence of Gadd45 $\beta$  (red; IV and V), which colocalized (yellow) with neuronal (NeuN, a marker of neurons; green; VII and X) but not microglial (OX-42, a marker of microglia; green; VIII and XI) or astrocyte (glial fibrillary acidic protein, a marker of astrocytes; green; IX and XII) markers, on day 7 postoperation. Scale bar = 50  $\mu$ m. Thickness = 50  $\mu$ m.  $^{**}P < 0.01$  versus Sham IPSI.  $^{###}P < 0.01$  versus SNL CONTRA.  $n = 7$ . Data represent mean  $\pm$  SD. IB = immunoblotting.

abundance of Gadd45 $\beta$  in the dorsal horn in response to experimental nerve injury. Western blotting revealed that SNL significantly increased the amount of Gadd45 $\beta$  in the ipsilateral, but not contralateral, dorsal horn on days 3, 7, 14,

and 21 after the operation (fig. 1A;  $0.22 \pm 0.06$ ,  $0.33 \pm 0.08$ ,  $0.47 \pm 0.10$ ,  $0.43 \pm 0.10$ , and  $0.45 \pm 0.08$ ;  $n = 6$ ). Moreover, the enhanced Gadd45 $\beta$  expression was temporally aligned with SNL-induced tactile allodynia, as shown by significant



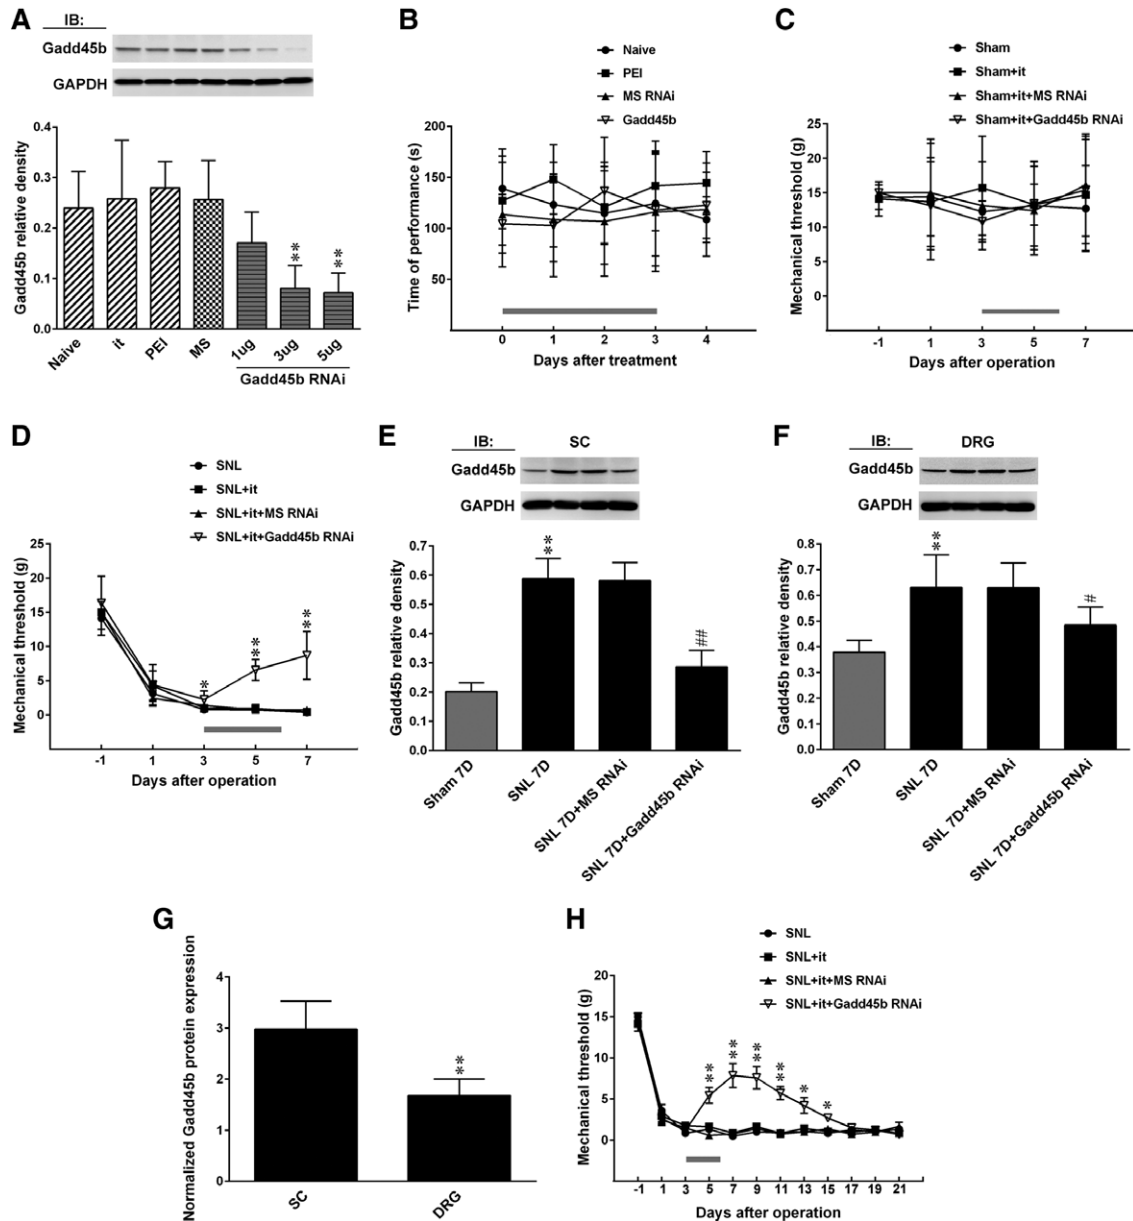

**Fig. 2.** Focal knockdown of spinal growth arrest and DNA-damage-inducible protein 45 $\beta$  (Gadd45 $\beta$ ) expression relieves spinal nerve ligation (SNL)-induced allodynia. (A) Representative Western blot and statistical analysis (normalized to glyceraldehyde 3-phosphate dehydrogenase protein [GAPDH]) demonstrating that spinal Gadd45 $\beta$  mRNA-targeting siRNA (Gadd45 $\beta$  RNAi; 1, 3, and 5  $\mu$ g; 10  $\mu$ l; once daily for 4 days), but not missense siRNA (MS RNAi; 5  $\mu$ g, 10  $\mu$ l), polyethylenimine (PEI, a transfection reagent; 10  $\mu$ l), or implantation of the intrathecal catheter alone (it), led to a dose-dependent decrease in Gadd45 $\beta$  levels in the ipsilateral dorsal horn of naive rats (Naive). \*\* $P$  < 0.01 versus Naive.  $n$  = 6. (B) The application of Gadd45 $\beta$  mRNA-targeting siRNA (Gadd45 $\beta$  RNAi; 5  $\mu$ g, 10  $\mu$ l; once daily for 4 days) failed to produce motor deficits in rats (rotarod test). The gray bar at the bottom indicates the duration of intrathecal administration.  $n$  = 7. (C, D) Although no significant effect on paw withdrawal threshold was observed in sham-operated animals (Sham), focal knockdown of spinal Gadd45 $\beta$  expression (SNL + it + Gadd45 $\beta$  RNAi; 5  $\mu$ g, 10  $\mu$ l; once daily on days 3 to 6 after SNL) ameliorated the SNL-decreased paw withdrawal threshold on days 5 and 7 postoperation (von Frey test). The gray bar at the bottom indicates the duration of spinal administration. \* $P$  < 0.05, \*\* $P$  < 0.01 versus SNL.  $n$  = 7. (E, F) Representative Western blot and statistical analyses (normalized to GAPDH) showing that, on day 7 postoperation (7D), the SNL-enhanced Gadd45 $\beta$  expression in the ipsilateral dorsal horn of the spinal cord (SC) and dorsal root ganglion (DRG) were attenuated by Gadd45 $\beta$  mRNA-targeting siRNA (SNL 7D + Gadd45 $\beta$  RNAi; 5  $\mu$ g, 10  $\mu$ l; once daily on days 3 to 6 after SNL). \* $P$  < 0.01 versus Sham 7D. # $P$  < 0.05. ## $P$  < 0.01 versus SNL 7D.  $n$  = 6. (G) The SNL-enhanced Gadd45 $\beta$  expression in the DRG was markedly lesser than that in the dorsal horn (SC; normalized to Sham 7D). \* $P$  < 0.01 versus SC.  $n$  = 6. (H) Treatment of Gadd45 $\beta$  mRNA-targeting siRNA (SNL + it + Gadd45 $\beta$  RNAi; 5  $\mu$ g, 10  $\mu$ l; once daily on days 3 to 6 after SNL) ameliorated the SNL-induced mechanical allodynia from days 5 to 15 after operation. \* $P$  < 0.05. \*\* $P$  < 0.01 versus SNL.  $n$  = 7. Data represent mean  $\pm$  SD. IB = immunoblotting.

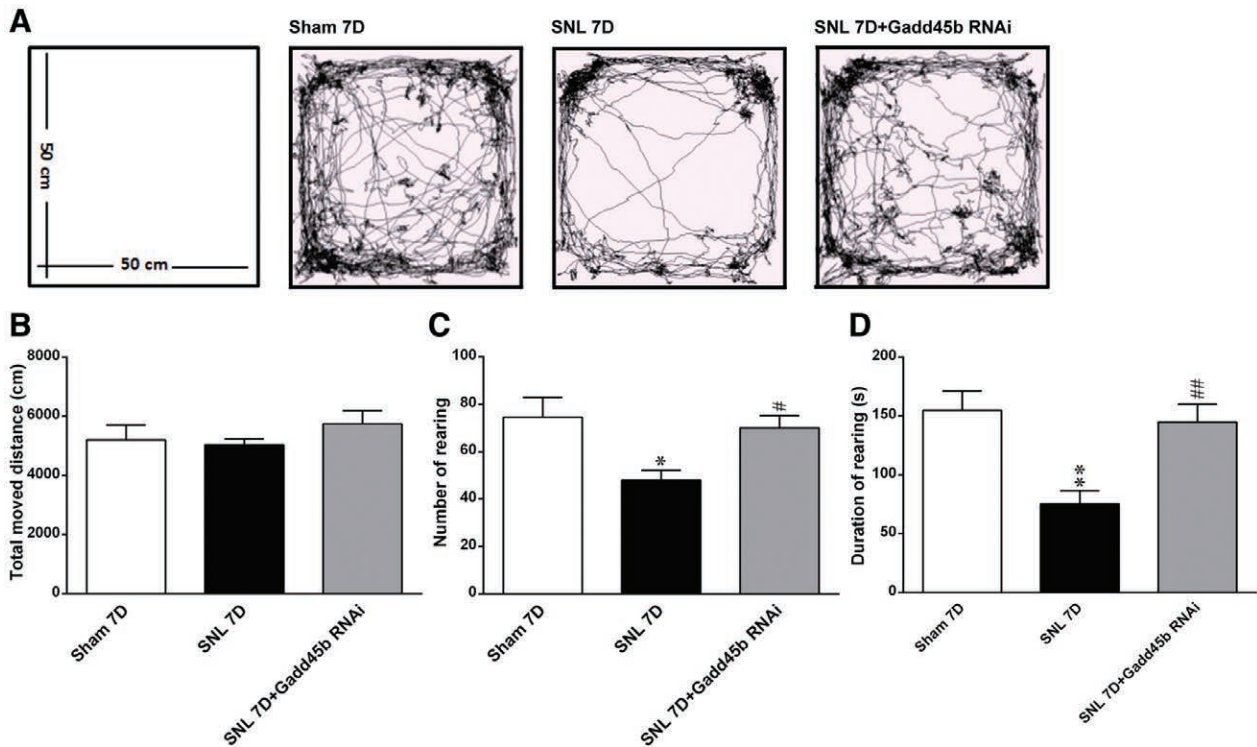

**Fig. 3.** Focal knockdown of spinal growth arrest and DNA-damage-inducible protein 45 $\beta$  (Gadd45 $\beta$ ) expression ameliorates unevoked pain-like behaviors. (A) Schematic diagram of the open-field arena and representative tracks of rat movement in this arena during 30 min. (B–D) Averaged bar charts of total moved distance, number of rearing, and duration of rearing obtained on day 7 postoperation from animals received sham operation (Sham 7D) and spinal nerve ligation (SNL 7D) without or with administration with Gadd45 $\beta$  mRNA-targeted siRNA (SNL 7D + Gadd45 $\beta$  RNAi; 5  $\mu$ g, 10  $\mu$ l; once daily on days 3 to 6 after SNL). \* $P$  < 0.05. \*\* $P$  < 0.01 versus Sham 7D. # $P$  < 0.05. ## $P$  < 0.01 versus SNL 7D.  $n$  = 6 to 9. Data represent mean  $\pm$  SD.

decreases in the withdrawal threshold of the ipsilateral hind paw at the same time points (fig. 1B;  $16.37 \pm 3.88$ ,  $1.55 \pm 1.22$ ,  $0.56 \pm 0.54$ ,  $0.60 \pm 0.46$ , and  $0.66 \pm 0.54$ ;  $n$  = 7). To visualize the cellular location of SNL-induced enhanced Gadd45 $\beta$  expression, spinal slices were labeled with specific antibodies on day 7 after the operation, the time point at which the behavioral hypersensitivity reached steady state and maximal spinal Gadd45 $\beta$  expression was observed. As anticipated, SNL increased the immunofluorescence of Gadd45 $\beta$  in the ipsilateral dorsal horn (Sham IPSI,  $20 \pm 7$ ; Sham contralateral [CONTRA],  $19 \pm 6$ ; SNL IPSI,  $82 \pm 18$ ; SNL CONTRA,  $25 \pm 9$ ;  $n$  = 7), and double labeling revealed that Gadd45 $\beta$  immunofluorescence colocalized with neuronal, but not microglial or astrocyte, markers (fig. 1C). These results suggest that neuropathic injury induces nociceptive hypersensitivity associated with enhanced Gadd45 $\beta$  expression selectively in ipsilateral dorsal horn neurons.

#### Knockdown of Spinal Gadd45 $\beta$ Expression Ameliorates SNL-induced Allodynia

To provide further evidence supporting the role of spinal Gadd45 $\beta$  in the development of neuropathic allodynia, we generated rats in which spinal Gadd45 $\beta$  expression was focally knocked down through daily intrathecal administration of an antisense siRNA specifically targeting Gadd45 $\beta$

mRNA. First, Western blotting demonstrated a dose-dependent decrease in the abundance of Gadd45 $\beta$  in dorsal horn samples from naive rats after intrathecal injection of a Gadd45 $\beta$  mRNA-targeted siRNA (fig. 2A; 1  $\mu$ g,  $0.17 \pm 0.06$ ; 3  $\mu$ g,  $0.08 \pm 0.04$ ; 5  $\mu$ g,  $0.07 \pm 0.03$ ; 10  $\mu$ l each; once daily for 4 days;  $n$  = 6) but not with injection of a missense siRNA (5  $\mu$ g, 10  $\mu$ l), polyethylenimine (a transfection reagent, 10  $\mu$ l), or intrathecal catheter implantation alone, indicating that spinal Gadd45 $\beta$  expression was specifically knocked down by the targeted siRNA. Rotarod analysis showed no significant difference in motor performance among the naive and polyethylenimine (10  $\mu$ l)-treated, missense siRNA (5  $\mu$ g, 10  $\mu$ l)-treated, or Gadd45 $\beta$  mRNA-targeted siRNA (5  $\mu$ g, 10  $\mu$ l)-treated groups (fig. 2B), suggesting that neither the control procedures nor spinal Gadd45 $\beta$  knockdown led to motor deficits in rats. The results of the von Frey test showed that while there was no effect on the withdrawal threshold of sham-operated animals (fig. 2C), daily administration of a Gadd45 $\beta$  mRNA-targeted siRNA (5  $\mu$ g, 10  $\mu$ l; once daily from days 3 to 6 postoperation) partially ameliorated SNL-induced behavioral allodynia, as evidenced by a significant increase in the withdrawal threshold on days 5 and 7 after the operation (fig. 2D;  $6.57 \pm 1.51$  and  $8.71 \pm 3.49$ ;  $n$  = 7). Moreover, a Gadd45 $\beta$  mRNA-targeted siRNA (5  $\mu$ g, 10  $\mu$ l) significantly decreased SNL-enhanced Gadd45 $\beta$  expression



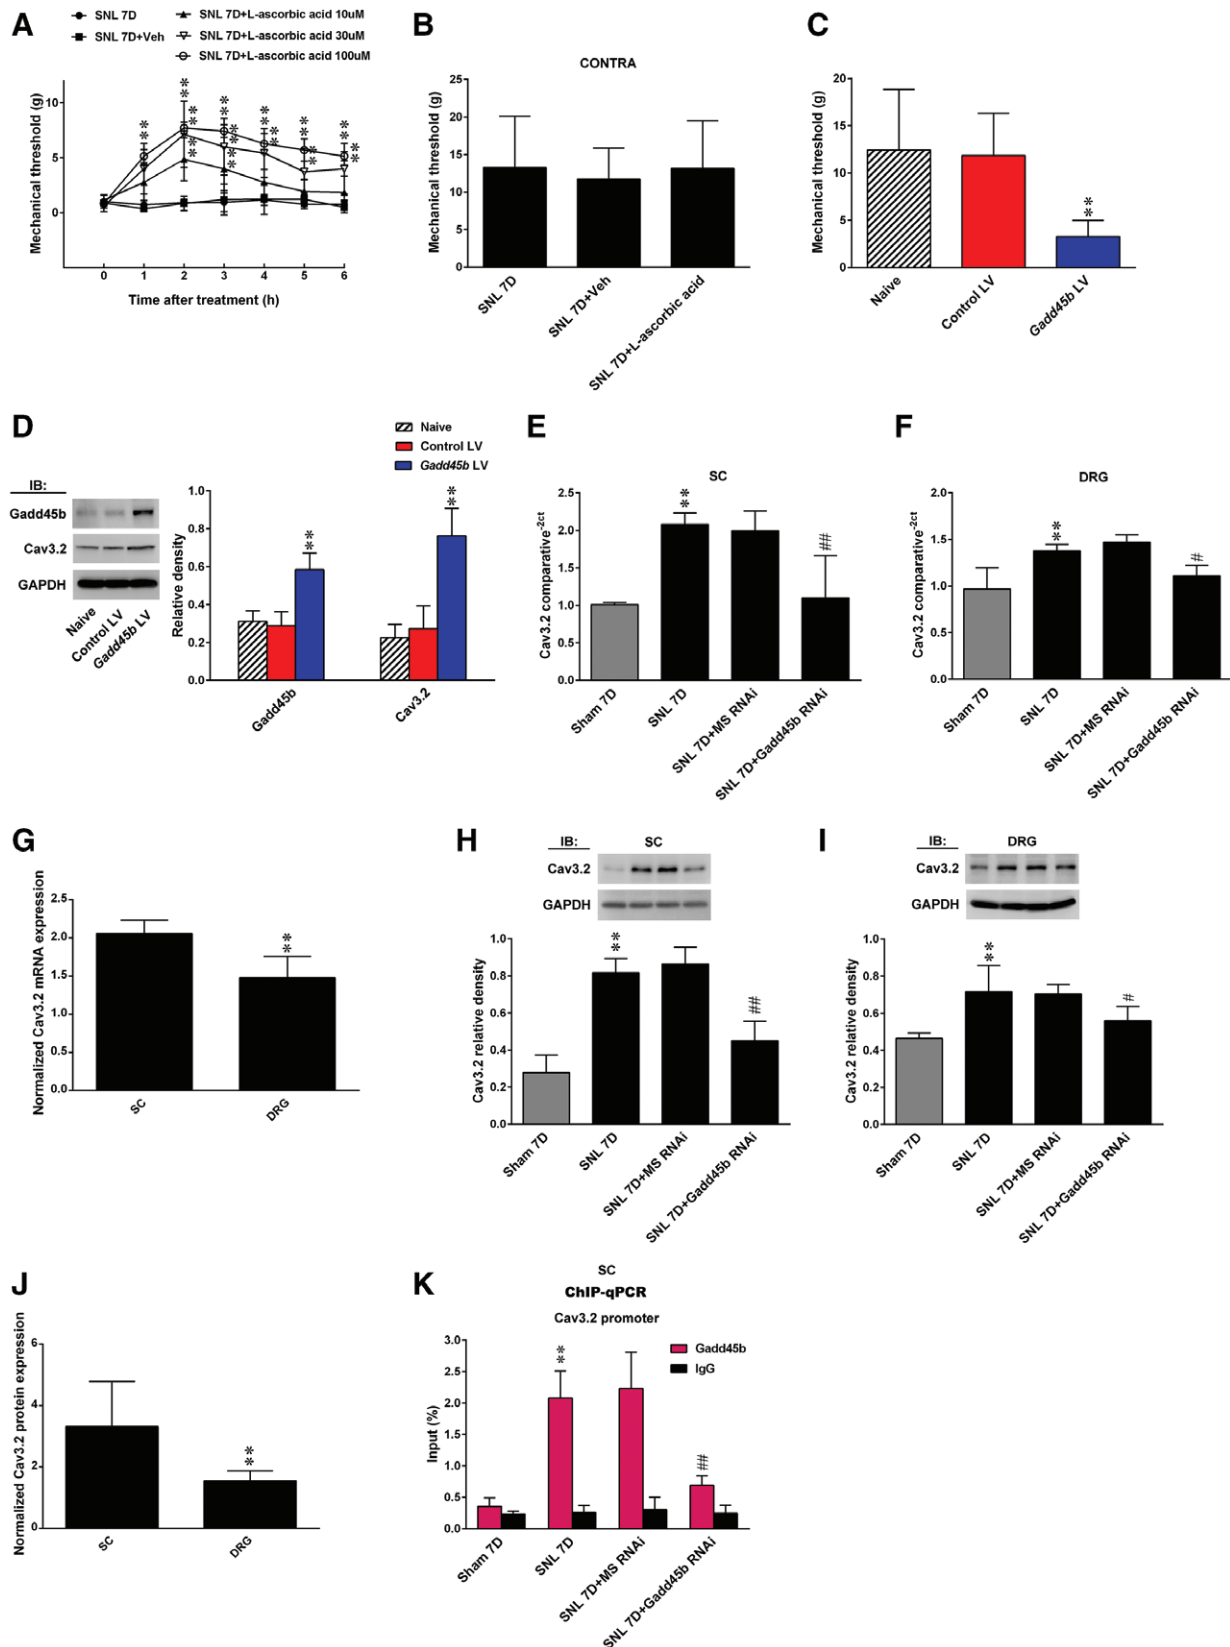

**Fig. 4.** Spinal nerve ligation (SNL) increases growth arrest and DNA-damage-inducible protein 45 $\beta$  (Gadd45 $\beta$ ) binding to the voltage-dependent T-type calcium channel 3.2 subunit ( $Ca_v3.2$ ) gene promoter to enhance  $Ca_v3.2$  expression in the dorsal horn. (A, B) Intrathecal administration with L-ascorbic acid (a selective  $Ca_v3.2$  antagonist; day 7 after spinal nerve ligation

**Fig. 4.** (Continued). [SNL 7D] + L-ascorbic acid; 10, 30, and 100  $\mu$ M, 10  $\mu$ l), but not the vehicle solution (SNL 7D + Veh, 10  $\mu$ l), increased the withdrawal threshold of the ipsilateral hind paw on SNL 7D. Nevertheless, both these treatments failed to affect the contralateral hind paw at 2 h after injection (SNL 7D + L-ascorbic acid; 100  $\mu$ M, 10  $\mu$ l; von Frey test).  $**P < 0.01$  versus SNL 7D.  $n = 7$ . (C) Intrathecal injections of lentiviral vector expressing Gadd45 $\beta$  into naive rat (Gadd45 $\beta$  LV;  $2.4 \times 10^7$  U/ml, 15  $\mu$ l) resulted in a decreased withdrawal threshold on day 14 after treatment. Intrathecal injections of control vector into naive rat (Control LV;  $2.2 \times 10^7$  U/ml, 15  $\mu$ l).  $**P < 0.01$  versus Naive.  $n = 7$ . (D) Representative Western blot and statistical analyses (normalized to glyceraldehyde 3-phosphate dehydrogenase protein [GAPDH]) showing that, on day 14 after treatment, intrathecal injections of lentiviral vector expressing Gadd45 $\beta$  (Gadd45 $\beta$  LV;  $2.4 \times 10^7$  U/ml, 15  $\mu$ l), not control vector (Control LV;  $2.2 \times 10^7$  U/ml, 15  $\mu$ l), into naive rat (Gadd45 $\beta$  LV;  $2.4 \times 10^7$  U/ml, 15  $\mu$ l) increased Gadd45 $\beta$  and Ca $_v$ 3.2 protein levels in ipsilateral dorsal horn.  $**P < 0.01$  versus Naive.  $n = 6$ . (E–J) Representative reverse-transcription polymerase chain reaction, Western blot, and statistical analysis (normalized to GAPDH) revealing that, compared with sham operation (Sham 7D), spinal nerve ligation (SNL 7D) increased Ca $_v$ 3.2 transcription or expression in ipsilateral dorsal horn of the spinal cord (SC) and dorsal root ganglion (DRG) samples harvested on day 7 postoperation, which was reversed by intrathecal application of Gadd45 $\beta$  mRNA-specific antisense siRNA (SNL 7D + Gadd45 $\beta$  RNAi; 5  $\mu$ g, 10  $\mu$ l; once daily on days 3 to 6 after SNL). Missense siRNA (MS RNAi; 5  $\mu$ g, 10  $\mu$ l).  $**P < 0.01$  versus Sham 7D.  $\#P < 0.05$ .  $##P < 0.01$  versus SNL 7D.  $n = 6$ . The SNL-enhanced Ca $_v$ 3.2 transcription or expression in the DRG was markedly lesser than that in the dorsal horn (SC; normalized to Sham 7D).  $**P < 0.01$  versus SC.  $n = 6$ . (K) Chromatin immunoprecipitation (ChIP) quantitative reverse-transcription polymerase chain reaction analysis showed that intrathecal application of Gadd45 $\beta$  mRNA-specific antisense siRNA (SNL 7D + Gadd45 $\beta$  RNAi; 5  $\mu$ g, 10  $\mu$ l; once daily on days 3 to 6 after SNL) reversed the SNL-enhanced binding of Gadd45 $\beta$  to the Ca $_v$ 3.2 promoter region in the ipsilateral dorsal horn on day 7 postoperation.  $**P < 0.01$  versus Sham 7D.  $##P < 0.01$  versus SNL 7D.  $n = 6$ . Data represent mean  $\pm$  SD. IB = immunoblotting.

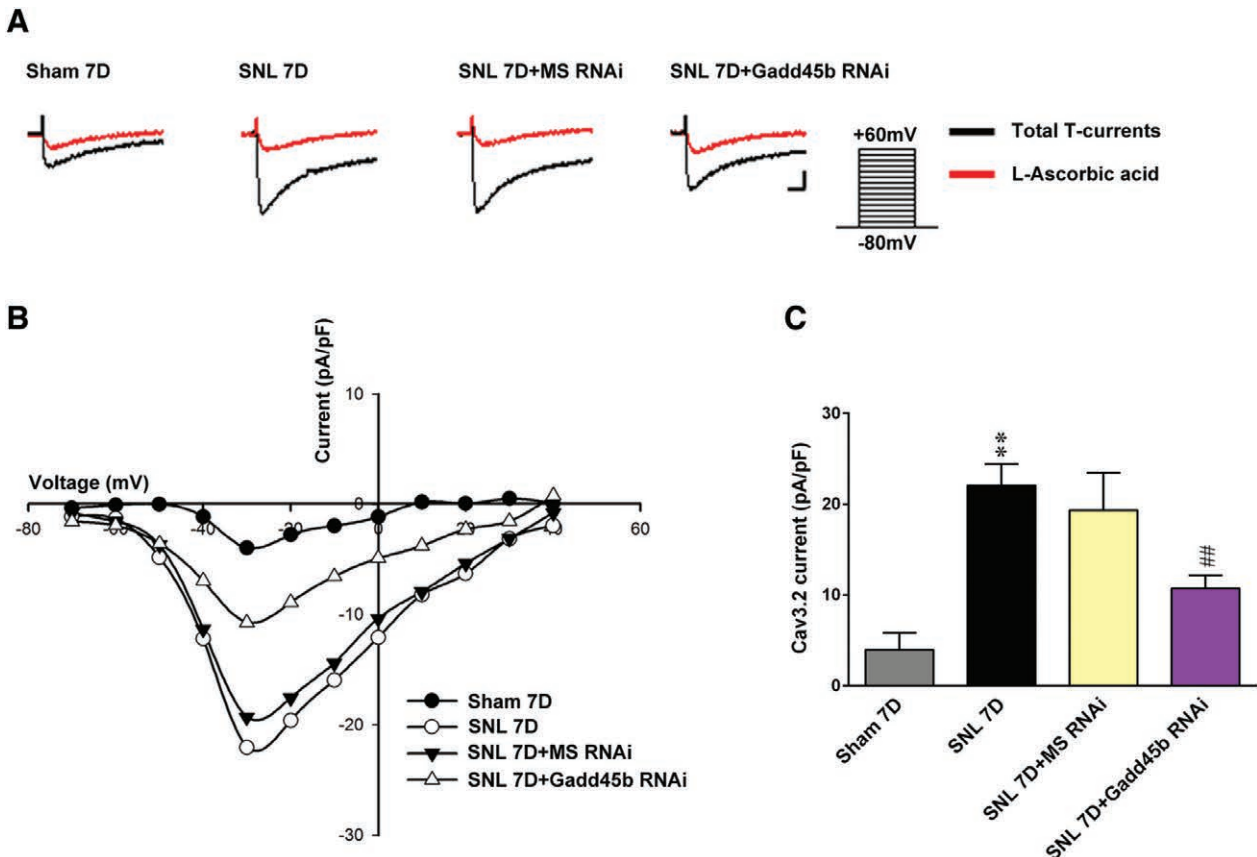

**Fig. 5.** Knockdown of growth arrest and DNA-damage-inducible protein 45 $\beta$  (Gadd45 $\beta$ ) expression restores nerve ligation-induced enhanced voltage-dependent T-type calcium channel 3.2 subunit (Ca $_v$ 3.2) currents in spinal dorsal horn neurons. (A) Representative traces of total voltage-dependent T-type currents (Total T-type currents) and Ca $_v$ 3.2 currents in spinal dorsal horn neurons on day 7 postoperation dissected from sham-operated (Sham 7D) and spinal nerve ligation (SNL 7D) rats as well as SNL rats treated with missense siRNA (SNL 7D + MS RNAi; 5  $\mu$ g, 10  $\mu$ l) and Gadd45 $\beta$ -targeting siRNA (SNL 7D + Gadd45 $\beta$  RNAi; 5  $\mu$ g, 10  $\mu$ l). L-Ascorbic acid, a Ca $_v$ 3.2 antagonist (300  $\mu$ M). (B) The current-voltage (I-V) curves of Ca $_v$ 3.2-dependent currents in spinal dorsal horn neurons from sham (Sham 7D) and SNL rats (SNL 7D) and SNL rats treated with Gadd45 $\beta$ -targeting siRNA (SNL 7D + Gadd45 $\beta$  RNAi) or missense siRNA (SNL 7D + MS RNAi). When compared with the sham operation, SNL increases peak currents of the I-V curve that is reversed by that intrathecally daily application of Gadd45 $\beta$ -targeting siRNA but not the missense siRNA. (C) Peak values of the Ca $_v$ 3.2-dependent current densities (pA-pF) showing reduced the peak amplitude of Ca $_v$ 3.2 currents compared with SNL group.  $**P < 0.01$  versus Sham 7D.  $##P < 0.01$  versus SNL 7D.  $n = 6$ . Data represent mean  $\pm$  SD.

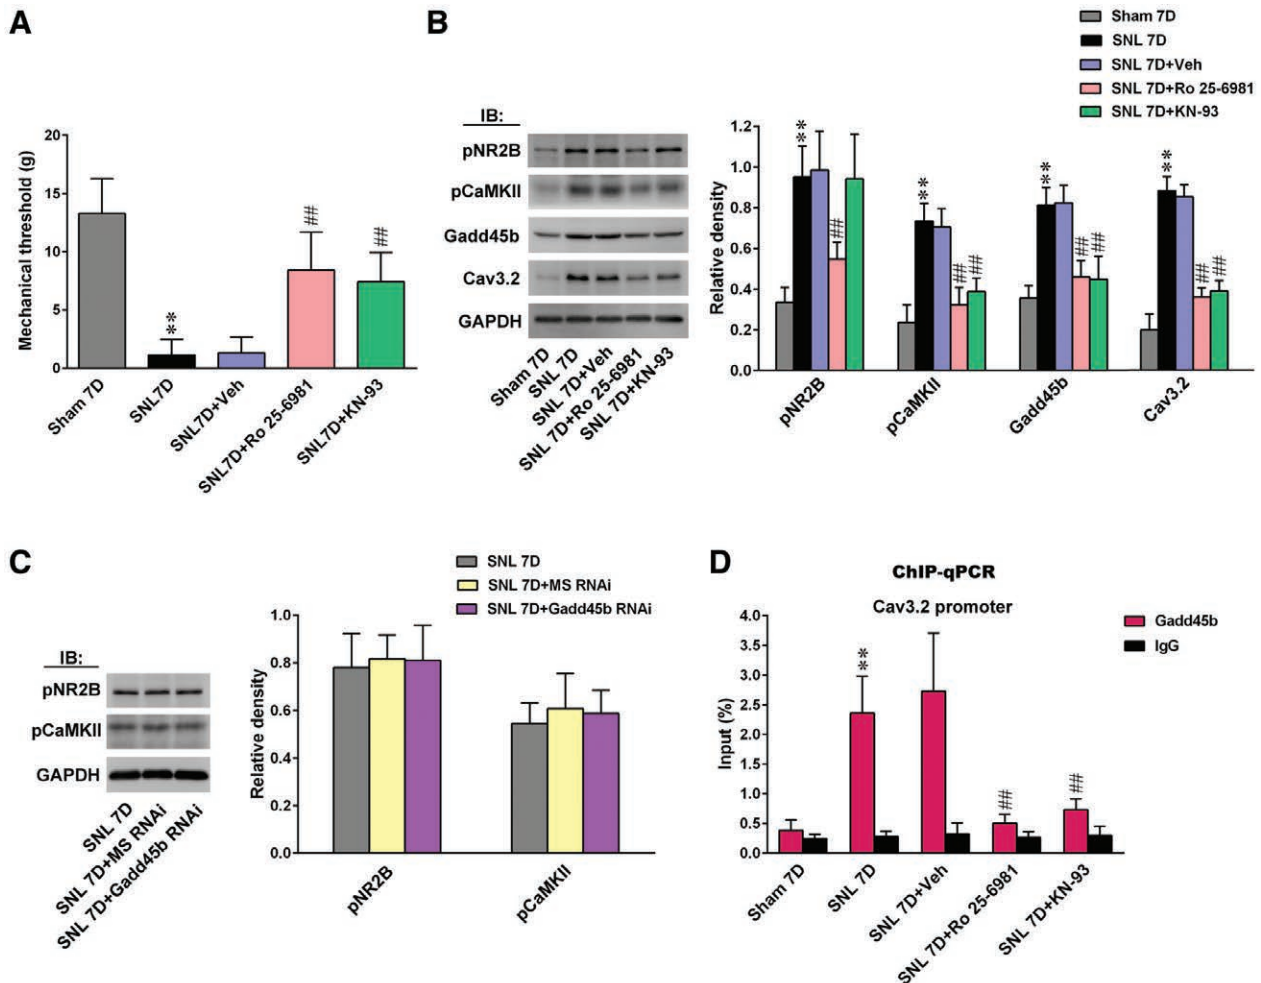

**Fig. 6.** Spinal nerve ligation provokes spinal NR2B-bearing NMDAR or calmodulin-dependent protein kinase II-dependent growth arrest and DNA-damage-inducible protein 45 $\beta$  (Gadd45 $\beta$ ) activation to alter voltage-dependent T-type calcium channel 3.2 subunit ( $Ca_v3.2$ ) expression. (A) Injection of Ro 25–6981 (day 7 after spinal nerve ligation [SNL 7D] + Ro 25–6981; an NR2B-bearing N-methyl-D-aspartate receptor antagonist; 100 nM, 10  $\mu$ l; once daily on days 3 to 6 after SNL) and KN-93 (SNL 7D + KN-93; a calmodulin-dependent protein kinase II [CaMKII] antagonist; 50 nM, 10  $\mu$ l; once daily on days 3 to 6 after SNL) both significantly reversed the SNL-decreased mechanical threshold on day 7. \*\* $P$  < 0.01 versus Sham 7D. ### $P$  < 0.01 versus SNL 7D.  $n$  = 7. (B) Representative Western blotting and statistical analysis (normalized to glyceraldehyde 3-phosphate dehydrogenase protein [GAPDH]) demonstrating that SNL (SNL 7D) increased phosphorylated NR2B (pNR2B), phosphorylated CaMKII (pCaMKII), Gadd45 $\beta$ , and  $Ca_v3.2$  expression in the ipsilateral dorsal horn on day 7 postoperation, which were all reversed by spinal daily administration of Ro 25–6981 (SNL 7D + Ro 25–6981; 100 nM, 10  $\mu$ l; once daily on days 3 to 6 after SNL). KN-93 (SNL 7D + KN-93; 50 nM, 10  $\mu$ l; once daily on days 3 to 6 after SNL) reversed the SNL-increased pCaMKII, Gadd45 $\beta$ , and  $Ca_v3.2$  expression in the ipsilateral dorsal horn on day 7 postoperation without affecting the abundance of pNR2B. \*\* $P$  < 0.01 versus Sham 7D. ### $P$  < 0.01 versus SNL 7D.  $n$  = 6. (C) Spinal administration of neither Gadd45 $\beta$  mRNA-targeting siRNA (SNL 7D + Gadd45 $\beta$  RNAi; 5  $\mu$ g, 10  $\mu$ l; once daily on days 3 to 6 after SNL) nor missense siRNA (SNL 7D + MS RNAi; 5  $\mu$ g, 10  $\mu$ l; once daily on days 3 to 6 after SNL) affected SNL-up-regulated pNR2B and pCaMKII expression in the ipsilateral dorsal horn on day 7 postoperation. (D) Chromatin immunoprecipitation (ChIP) quantitative reverse-transcription polymerase chain reaction analysis showed that SNL (SNL 7D) increased the binding of Gadd45 $\beta$  to the  $Ca_v3.2$  promoter region in the ipsilateral dorsal horn on day 7 after operation, which was reversed by intrathecal application of Ro 25–6981 (SNL 7D + Ro 25–6981; 100 nM, 10  $\mu$ l; once daily on days 3 to 6 after SNL) and KN-93 (SNL 7D + KN-93; 50 nM, 10  $\mu$ l; once daily on days 3 to 6 after SNL). \*\* $P$  < 0.01 versus Sham 7D. ### $P$  < 0.01 versus SNL 7D.  $n$  = 6. Data represent mean  $\pm$  SD. IB = immunoblotting; Sham = sham operation; Veh = vehicle.

in the ipsilateral dorsal horn and DRG on day 7 after the operation (fig. 2, E and F; from  $0.58 \pm 0.06$  to  $0.28 \pm 0.05$  and from  $0.63 \pm 0.12$  to  $0.48 \pm 0.07$ ;  $n$  = 6). Furthermore, the SNL-enhanced Gadd45 $\beta$  expression in the DRG was markedly less than that seen the dorsal horn (fig. 2G; spinal

cord,  $2.97 \pm 0.54$ ; DRG,  $1.67 \pm 0.32$ ;  $n$  = 6). Additionally, we found that after administration of Gadd45 $\beta$  mRNA-targeted siRNA for 4 days, SNL-associated allodynia gradually resolved by day 17 after the operation (fig. 2H;  $14.12 \pm 2.47$ ,  $2.62 \pm 1.76$ ,  $1.14 \pm 0.49$ ,  $5.42 \pm 2.50$ ,  $7.85 \pm 3.84$ ,  $7.57 \pm 3.55$ ,



5.71  $\pm$  2.13, 4.20  $\pm$  2.53, 2.68  $\pm$  1.25, 1.51  $\pm$  0.62, 1.22  $\pm$  0.63, and 0.69  $\pm$  0.41;  $n$  = 7). Taken together, these data suggest that spinal Gadd45 $\beta$  significantly contributes to SNL-associated nociceptive hypersensitivity.

### **Knockdown of Spinal Gadd45 $\beta$ Expression Ameliorates SNL-decreased Rearing Activity**

Rearing behavior were recorded on day 7 postoperation from animals that received sham operation and SNL with or without administration with Gadd45 $\beta$  mRNA-targeted siRNA (fig. 3A). Compared to the sham operation, SNL significantly decreased the number and duration of rearing (fig. 3B–D). Furthermore, intrathecal application of a Gadd45 $\beta$  mRNA-targeted siRNA significantly increased the number and duration of rearing compared to the SNL group (fig. 3B–D). This result indicated that SNL-modified rearing behaviors could be reversed by focal knockdown of spinal Gadd45 $\beta$  expression.

### **Spinal Gadd45 $\beta$ Promotes Ca $_v$ 3.2 Expression after SNL**

In the CNS, Gadd45 $\beta$  has been shown to reactivate methylation-silenced target loci.<sup>3</sup> As the transcription of the Ca $_v$ 3.2 gene is thought to be regulated by the methylation of CpG sites,<sup>8</sup> and spinal Ca $_v$ 3.2 channels are proposed to mediate neuropathic hypersensitivity,<sup>35</sup> we wondered whether spinal Gadd45 $\beta$  participates in the development of neuropathic allodynia by promoting Ca $_v$ 3.2 expression. To characterize the role of Ca $_v$ 3.2 in neuropathic allodynia, we first examined whether antagonism of spinal Ca $_v$ 3.2 would affect this process using L-ascorbic acid (a selective Ca $_v$ 3.2 antagonist).<sup>36</sup> Seven days after SNL, intrathecal injections of L-ascorbic acid (10, 30, or 100  $\mu$ M; 10  $\mu$ l each) dose dependently increased the withdrawal threshold of the ipsilateral hind paw 1 to 6 h after injection (fig. 4A; 10  $\mu$ M: 2.77  $\pm$  1.64, 4.85  $\pm$  1.95, 4.00  $\pm$  2.00, 2.77  $\pm$  1.16, 1.94  $\pm$  1.07, and 1.85  $\pm$  1.48; 30  $\mu$ M: 4.00  $\pm$  2.30, 7.14  $\pm$  3.02, 6.00  $\pm$  2.58, 5.42  $\pm$  2.22, 3.71  $\pm$  2.13, and 4.00  $\pm$  2.31; 100  $\mu$ M: 5.14  $\pm$  1.57, 7.71  $\pm$  1.38, 7.42  $\pm$  1.51, 6.28  $\pm$  2.42, 5.71  $\pm$  2.69, and 5.14  $\pm$  1.06;  $n$  = 7). Moreover, L-ascorbic acid injection (100  $\mu$ M, 10  $\mu$ l) did not affect the response of the contralateral hind paw 2 h after injection, a time point at which L-ascorbic acid displays its maximal analgesic effects (fig. 4B). We next examined whether over-expression of Gadd45 $\beta$  in naive rats is sufficient to enhance the Ca $_v$ 3.2 expression that underlies the development of allodynia. Intriguingly, intrathecal injections of lentiviral vector (LV) expressing Gadd45 $\beta$ , but not a control vector, into naive rats resulted in a decreased withdrawal threshold (Naive, 12.42  $\pm$  6.42; control LV, 11.85  $\pm$  4.45; Gadd45 $\beta$  LV, 3.28  $\pm$  1.70;  $n$  = 7) associated with increases in Gadd45 $\beta$  and Ca $_v$ 3.2 protein levels in the ipsilateral dorsal horn (0.58  $\pm$  0.08 and 0.76  $\pm$  0.14;  $n$  = 6) on day 14 after treatment (fig. 4, C and D). Next, we explored whether the transcription or protein expression of Ca $_v$ 3.2 in the ipsilateral dorsal horn and DRG was altered after SNL and if these changes were affected by knockdown of Gadd45 $\beta$ . In ipsilateral dorsal horn and

DRG samples harvested on day 7 postoperation, we found that the mRNA (2.08  $\pm$  0.15 and 1.37  $\pm$  0.06;  $n$  = 5) and protein (0.81  $\pm$  0.07 and 0.71  $\pm$  0.14;  $n$  = 6) levels of Ca $_v$ 3.2 were both significantly increased in the SNL group compared with the sham-operated group (fig. 4E–J). Conversely, the SNL-induced up-regulation of Ca $_v$ 3.2 mRNA and protein levels in the ipsilateral dorsal horn and DRG was significantly decreased by intrathecal administration of a Gadd45 $\beta$  mRNA-targeted siRNA (5  $\mu$ g, 10  $\mu$ l; spinal cord, 1.09  $\pm$  0.56 and 0.45  $\pm$  0.10; DRG, 1.10  $\pm$  0.11 and 0.55  $\pm$  0.07;  $n$  = 5 or 6). Interestingly, the magnitude of the changes in mRNA and protein expression in the DRG was markedly less than that seen in the dorsal horn (mRNA, 2.06  $\pm$  0.16 and 1.47  $\pm$  0.28; protein, 3.31  $\pm$  1.46 and 1.54  $\pm$  0.32;  $n$  = 6). ChIP quantitative reverse-transcription polymerase chain reaction analysis of ipsilateral dorsal horn samples further demonstrated that SNL significantly increased the binding of Gadd45 $\beta$  to the Ca $_v$ 3.2 promoter on day 7 after the operation (2.08  $\pm$  0.42;  $n$  = 6), and this was reversed by intrathecal application of a Gadd45 $\beta$  mRNA-targeted siRNA (fig. 4K; 5  $\mu$ g, 10  $\mu$ l; 0.68  $\pm$  0.15;  $n$  = 6). Taken together, these findings suggest that SNL promotes Gadd45 $\beta$  expression, which in turn promotes Ca $_v$ 3.2 transcription and expression in the dorsal horn, to mediate nociceptive hypersensitivity postneuropathic injury.

### **Gadd45 $\beta$ Mediates SNL-induced Enhancement of Ca $_v$ 3.2 Channel-mediated Currents**

We next studied whether genetic knockdown of Gadd45 $\beta$  could reverse the SNL-induced enhancement of Ca $_v$ 3.2 currents in spinal dorsal horn neurons. To test this hypothesis, we analyzed the relative contribution of Ca $_v$ 3.2-dependent current to the total T-type calcium channel current in dorsal horn neurons in spinal slices dissected on day 7 postoperation. When compared with sham-operated animals (Sham 7D), SNL significantly increased total T-type current compared to dorsal horn neurons from sham-operated animals (Sham 7D) (fig. 5A). This effect was attenuated by administration of a Gadd45 $\beta$  mRNA-targeted siRNA (SNL 7D + Gadd45 $\beta$  RNAi; fig. 5A) but not a missense siRNA (SNL 7D + MS RNAi). Application of 300  $\mu$ M L-ascorbic acid largely abolished the SNL-induced enhancement of currents. We isolated the current–voltage (I–V) relationship of the Ca $_v$ 3.2-dependent current by subtracting the current observed in the presence of L-ascorbic acid from the total T-type calcium channel current. Knockdown of spinal Gadd45 $\beta$  expression significantly decreased Ca $_v$ 3.2-dependent current compared to the same current in neurons from rats that received SNL (fig. 5, B and C; Sham 7D, 3.31  $\pm$  1.46; SNL 7D, 22.05  $\pm$  2.40; SNL 7D + MS RNAi, 19.30  $\pm$  4.15; SNL 7D + Gadd45 $\beta$  RNAi, 10.73  $\pm$  1.39;  $n$  = 6) as evidenced by the I–V relationship and peak I–V values (fig. 5, B and C; Sham 7D, 3.31  $\pm$  1.46; SNL 7D, 22.05  $\pm$  2.40; SNL 7D + MS RNAi, 19.30  $\pm$  4.15; SNL 7D + Gadd45 $\beta$  RNAi, 10.73  $\pm$  1.39;  $n$  = 6). These results imply that the functional significance of spinal Gadd45 $\beta$  in the development of neuropathic allodynia is its impact on Ca $_v$ 3.2 in dorsal horn neurons.

### NR2B-containing NMDAR or CaMKII Signaling Promotes Gadd45 $\beta$ -mediated Spinal Ca $_v$ 3.2 Expression after SNL

A previous study demonstrated that an NMDAR agonist leads to the activation of CaMK, which up-regulates Gadd45 $\beta$  expression, resulting in the induction of target gene transcription.<sup>5</sup> NR2B-containing NMDAR or CaMKII signaling has also been linked to the machinery underlying neuropathic pain development,<sup>13</sup> and we previously demonstrated that NR2B-containing NMDAR phosphorylation in the spinal neuraxis is critical for SNL-induced behavioral allodynia.<sup>14</sup> In addition, calcium ion-dependent CaMKII signaling epigenetically regulates mechanisms of calcium channel transcription,<sup>17</sup> and Ca $_v$ 3.2 channels are associated with NMDAR<sup>15</sup> and CaMKII signaling<sup>16</sup> in neurons. Thus, we examined whether NR2B-containing NMDAR phosphorylation contributes to the development of neuropathic allodynia *via* NMDAR or CaMKII signaling and downstream Gadd45 $\beta$ -promoted Ca $_v$ 3.2 expression. The von Frey test showed that the daily administration of Ro 25–6981 (an NR2B antagonist; 100 nM, 10  $\mu$ l; daily for 4 days from days 3 to 6 after SNL;  $9.28 \pm 3.09$ ;  $n = 7$ ) and KN-93 (a CaMKII antagonist; 50 nM, 10  $\mu$ l; daily for 4 days from days 3 to 6 after SNL;  $8.71 \pm 3.30$ ;  $n = 7$ ), but not a vehicle solution (10  $\mu$ l), reversed the decrease in withdrawal threshold of the ipsilateral hind paw normally apparent at 3 h after SNL 7D (fig. 6A;  $1.21 \pm 0.71$ ;  $n = 7$ ). On day 7 postoperation, we found that SNL predictably increased the abundance of pNR2B, pCaMKII, Gadd45 $\beta$ , and Ca $_v$ 3.2 in the ipsilateral dorsal horn ( $0.95 \pm 0.15$ ,  $0.73 \pm 0.08$ ,  $0.81 \pm 0.08$ , and  $0.88 \pm 0.06$ ;  $n = 6$ ), and these effects were markedly reversed by daily intrathecal injection of Ro 25–6981 injection (fig. 6B; 100 nM, 10  $\mu$ l; daily for 4 days from days 3 to 6 after SNL;  $0.54 \pm 0.08$ ,  $0.32 \pm 0.08$ ,  $0.45 \pm 0.08$ , and  $0.36 \pm 0.04$ ;  $n = 6$ ). Moreover, treating animals that received SNL with KN-93 (50 nM, 10  $\mu$ l; daily from days 3 to 6 after SNL) also significantly reversed SNL-enhanced protein expression ( $0.38 \pm 0.06$ ,  $0.44 \pm 0.11$ , and  $0.38 \pm 0.05$ ;  $n = 6$ ), with the exception of pNR2B ( $0.94 \pm 0.21$ ;  $n = 6$ ). Importantly, intrathecal administration of neither a Gadd45 $\beta$  mRNA-targeted siRNA (5  $\mu$ g, 10  $\mu$ l) nor a missense siRNA (10  $\mu$ l) affected SNL-mediated pNR2B or pCaMKII expression (fig. 6C). These results suggest that pNR2B or CaMKII signaling functions upstream of Gadd45 $\beta$ -regulated Ca $_v$ 3.2 expression in mediating SNL-induced neuropathic allodynia. Finally, based on the above findings, we examined whether the SNL-induced binding of Gadd45 $\beta$  to the Ca $_v$ 3.2 promoter was affected by intrathecal application of Ro 25–6981 or KN-93. In samples taken from the ipsilateral dorsal horn on day 7 after the operation, we observed an SNL-induced increase in Gadd45 $\beta$  binding to the Ca $_v$ 3.2 promoter ( $2.35 \pm 0.62$ ;  $n = 6$ ) that was significantly reversed by intrathecal administration with Ro 25–6981 (100 nM, 10  $\mu$ l; daily for 4 days from days 3 to 6 after SNL;  $0.50 \pm 0.15$ ;  $n = 6$ ) and KN-93 (fig. 6D; 50 nM, 10  $\mu$ l; daily for 4 days from days 3 to 6 after SNL;  $0.73 \pm 0.18$ ;  $n = 6$ ). In addition, immunohistochemical analysis revealed that SNL, but not a sham operation,

enhanced the levels of pNR2B ( $91 \pm 16$ ), pCaMKII ( $60 \pm 9$ ), Gadd45 $\beta$  ( $64 \pm 12$ ), and pNR2B, pCaMKII, or Gadd45 $\beta$  triple-labeled immunoreactivity ( $32 \pm 20$ ) in the ipsilateral dorsal horn on day 7 postoperation, and this effect was also reversed by spinal administration of Ro 25–6981 (fig. 7A; 100 nM, 10  $\mu$ l; daily for 4 days from days 3 to 6 after SNL;  $25 \pm 12$ ,  $28 \pm 11$ ,  $24 \pm 8$ , and  $10 \pm 5$ ;  $n = 7$ ). Spinal administration of KN-93 (50 nM, 10  $\mu$ l; daily for 4 days from days 3 to 6 after SNL) ameliorated the SNL-induced increase in the levels of pCaMKII ( $25 \pm 9$ ), Gadd45 $\beta$  ( $24 \pm 7$ ), and pNR2B, pCaMKII, or Gadd45 $\beta$  ( $9 \pm 5$ ) triple-labeled immunoreactivity in the ipsilateral dorsal horn on day 7 postoperation but did not affect the SNL-induced increase in the level of spinal pNR2B expression ( $87 \pm 21$ ;  $n = 7$ ). Taken together, these data suggest that SNL-induced spinal NR2B phosphorylation activates Gadd45 $\beta$ -mediated Ca $_v$ 3.2 expression *via* NMDAR or CaMKII signaling.

### SNL-activated Spinal NR2B, CaMKII, or Gadd45 $\beta$ Signaling Promotes Demethylation of the Ca $_v$ 3.2 Promoter via Conversion of 5-Formylcytosine and 5-Carboxylcytosine to 5-Cytosine

Gadd45 $\beta$  has been implicated in active DNA demethylation within target promoters, which reactivates methylation-silenced target loci.<sup>3</sup> Gadd45 has been demonstrated to promote active DNA demethylation by recognizing and excising 5-formylcytosine and/or 5-carboxylcytosine,<sup>24</sup> which are DNA demethylation intermediates, thereby resulting in reversion to unmodified 5-cytosine for complete DNA demethylation.<sup>19,20</sup> To extend our findings, we first assayed the enrichment of unmodified 5-cytosine at the Ca $_v$ 3.2 promoter after SNL. We found that SNL increased the amount of unmodified 5-cytosine at the Ca $_v$ 3.2 promoter (fig. 8A;  $2.16 \pm 0.42$ ;  $n = 6$ ) and that this effect was reduced by the administration of Ro 25–6981 (100 nM, 10  $\mu$ l; daily for 4 days from days 3 to 6 after SNL;  $0.59 \pm 0.10$ ;  $n = 6$ ), KN-93 (50 nM, 10  $\mu$ l; daily for 4 days from days 3 to 6 after SNL;  $0.71 \pm 0.16$ ;  $n = 6$ ), or a Gadd45 $\beta$  mRNA-targeted siRNA (5  $\mu$ g, 10  $\mu$ l; daily for 4 days from days 3 to 6 after SNL;  $0.37 \pm 0.11$ ;  $n = 6$ ). Furthermore, we found that SNL significantly increased the global levels of 5-formylcytosine and 5-carboxylcytosine in the ipsilateral dorsal horn on day 7 postoperation (fig. 8, B and C;  $9.22 \pm 2.29$  and  $7.39 \pm 1.99$ ;  $n = 6$ ). Notably, intrathecal administration of Ro 25–6981 (100 nM, 10  $\mu$ l; daily for 4 days from days 3 to 6 after SNL), KN-93 (50 nM, 10  $\mu$ l; daily for 4 days from days 3 to 6 after SNL), or a Gadd45 $\beta$  mRNA-targeted siRNA (5  $\mu$ g, 10  $\mu$ l; daily for 4 days from days 3 to 6 after SNL) further enhanced the SNL-induced increase in the global levels of 5-formylcytosine ( $15.88 \pm 2.36$ ,  $16.63 \pm 2.79$ , and  $15.72 \pm 3.94$ ;  $n = 6$ ) and 5-carboxylcytosine ( $12.84 \pm 1.85$ ,  $12.92 \pm 2.86$ , and  $12.82 \pm 3.59$ ;  $n = 6$ ) in the ipsilateral dorsal horn. These results imply that NR2B-containing NMDAR or CaMKII signaling promotes Gadd45 $\beta$ -dependent DNA

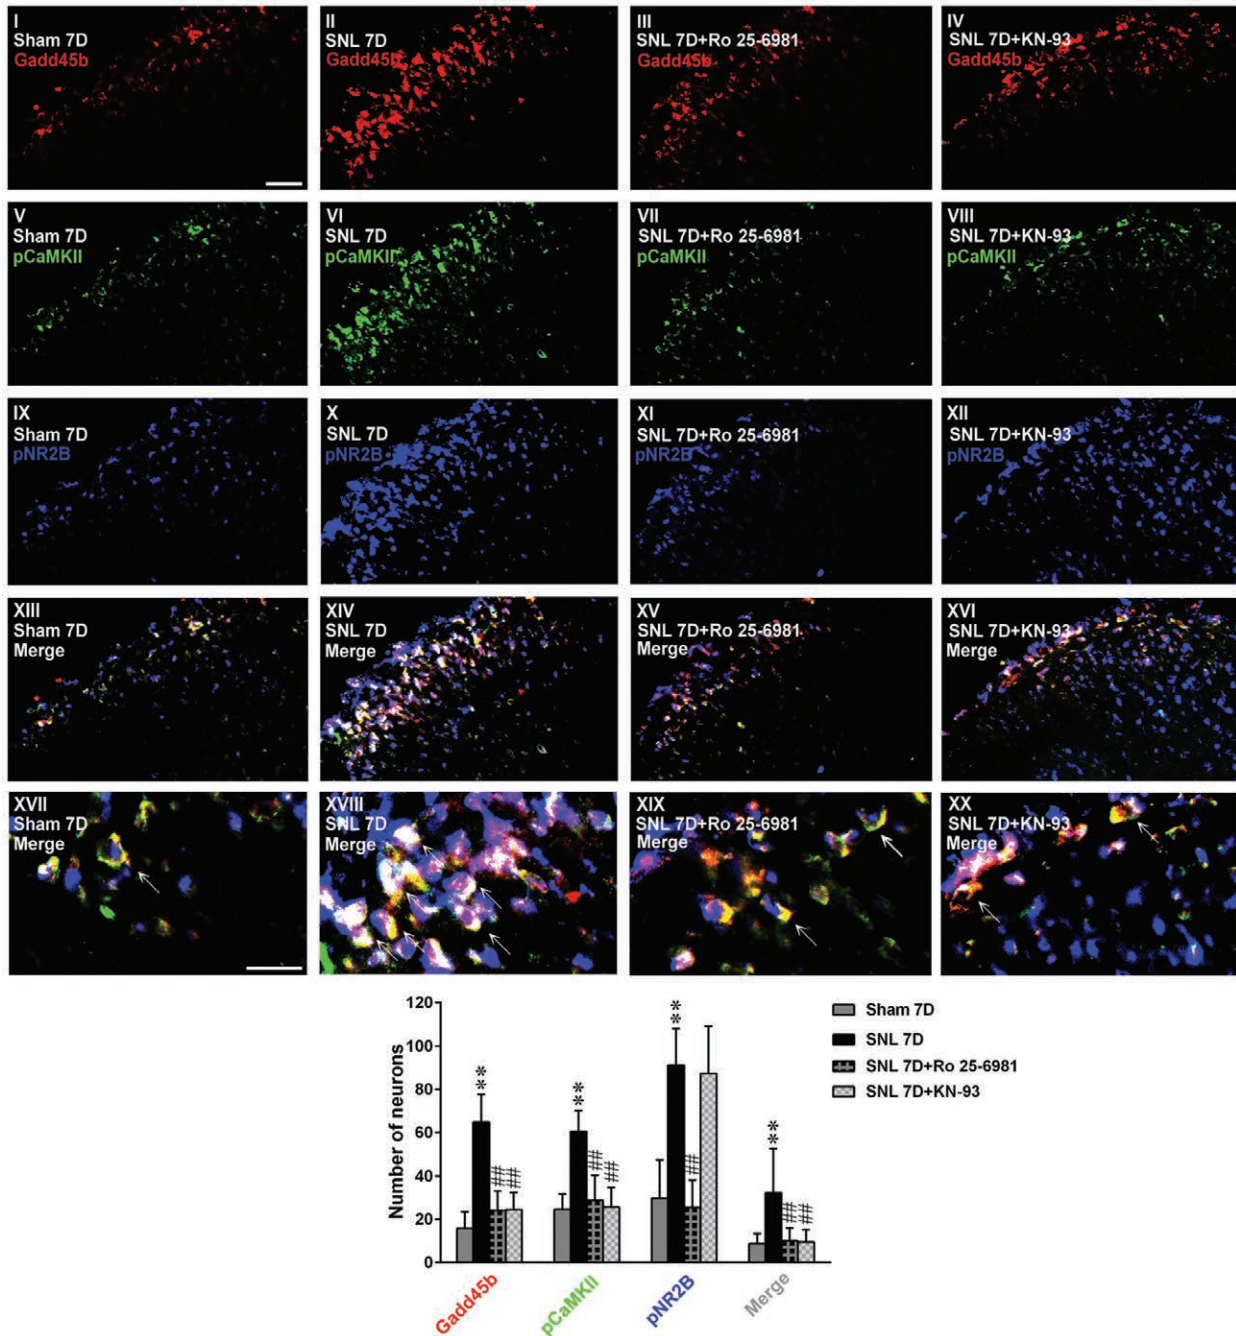

**Fig. 7.** Spinal nerve ligation activates spinal NR2B-bearing NMDAR or calmodulin-dependent protein kinase II signaling and downstream growth arrest and DNA-damage-inducible protein 45 $\beta$  (Gadd45 $\beta$ ) to mediate behavioral allodynia. Image analysis demonstrated that, compared with sham operation (Sham 7D), spinal nerve ligation (SNL 7D) markedly increased phosphorylated NR2B-bearing *N*-methyl-D-aspartate receptor (pNR2B, red), phosphorylated calmodulin-dependent protein kinase II (pCaMKII, green), Gadd45 $\beta$  (blue), and pNR2B, pCaMKII, or Gadd45 $\beta$  triple-labeled (merge, white) immunofluorescence in the ipsilateral dorsal horn on day 7 postoperation, which were all reversed by spinal administration of Ro 25-6981 (SNL 7D + Ro 25-6981; a selective NR2B receptor antagonist; 100 nM, 10  $\mu$ l; once daily on days 3 to 6 after SNL). KN-93 (SNL 7D + KN-93; a CaMKII antagonist; 50 nM; once daily on days 3 to 6 after SNL) reversed the SNL-increased pCaMKII, Gadd45 $\beta$  expression, and pNR2B, pCaMKII, or Gadd45 $\beta$  triple-labeled (white) without affecting the levels of pNR2B. Scale bar = 50  $\mu$ m. Thickness = 50  $\mu$ m. \*\**P* < 0.01 versus Sham 7D. ##*P* < 0.01 versus SNL 7D. *n* = 7. Data represent mean  $\pm$  SD.



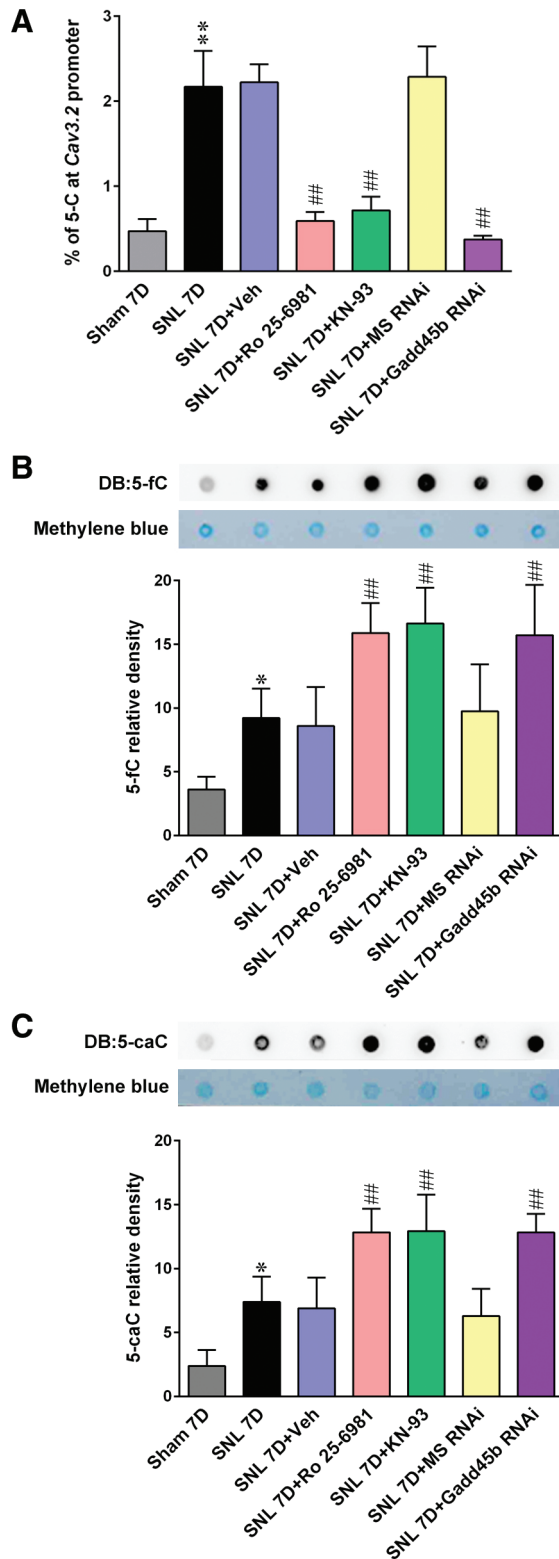

**Fig. 8.** Spinal nerve ligation-provoked spinal NR2B-bearing NMDAR or calmodulin-dependent protein kinase II or growth arrest and DNA-damage-inducible protein 45 $\beta$  (Gadd45 $\beta$ ) or voltage-dependent T-type calcium channel 3.2 subunit (Ca $_v$ 3.2) signaling promotes 5-formylcytosine (5-fC) or 5-cytosine and 5-carboxylcytosine (5-caC) or 5-cytosine conversion. (A) Representative statistical analysis revealing that the spinal nerve

demethylation at the Ca $_v$ 3.2 promoter through the conversion of 5-carboxylcytosine and 5-formylcytosine to 5-cytosine after SNL.

## Discussion

In this study, we verified the pivotal role of spinal Gadd45 $\beta$  in nociceptive hypersensitivity after neuropathic insult and revealed that NR2B-containing NMDAR or CaMKII signaling facilitates Gadd45 $\beta$ -mediated DNA demethylation at the Ca $_v$ 3.2 promoter in dorsal horn neurons to underlie the development of neuropathic allodynia. Our conclusion is based on results showing that neuropathic injury-induced allodynia is accompanied by the time-dependent up-regulation of Gadd45 $\beta$  expression in ipsilateral dorsal horn neurons. Knockdown of Gadd45 $\beta$  expression not only attenuated SNL-induced allodynia but also inhibited the SNL-induced enhancement of Ca $_v$ 3.2 expression, Ca $_v$ 3.2-dependent currents, and Gadd45 $\beta$  binding to the Ca $_v$ 3.2 promoter in the dorsal horn on day 7 postoperation. Conversely, over-expression of Gadd45 $\beta$  in naive rats provoked allodynia and up-regulated spinal Ca $_v$ 3.2 expression. Through the daily intrathecal administration of NR2B- or CaMKII-specific antagonists or through a Gadd45 $\beta$  mRNA-targeted siRNA in allodynic rats, we found that NR2B-containing NMDAR or CaMKII signaling contributes to the development of allodynia *via* the potentiation of Gadd45 $\beta$ -mediated Ca $_v$ 3.2 gene demethylation in the dorsal horn. Additionally, daily intrathecal application of Ro 25–6981, KN-93, or a

**Fig. 8.** (Continued). ligation (SNL)-induced increased in unmodified 5-cytosine enrichment at the Ca $_v$ 3.2 promoter on day 7 postoperation was reversed by intrathecal administration of Ro 25–6981 (SNL 7D + Ro 25–6981; an NR2B-bearing N-methyl-D-aspartate receptor antagonist; 100nM, 10  $\mu$ l; once daily on days 3 to 6 after SNL), KN-93 (SNL 7D + KN-93; a calmodulin-dependent protein kinase II [CaMKII] antagonist; 50nM, 10  $\mu$ l; once daily on days 3 to 6 after SNL) and Gadd45 $\beta$  mRNA-targeting siRNA (SNL 7D + Gadd45 $\beta$  RNAi; 5  $\mu$ g, 10  $\mu$ l; once daily on days 3 to 6 after SNL). Missense siRNA (MS RNAi; 5  $\mu$ g, 10  $\mu$ l). \*\* $P$  < 0.01 versus Sham 7D. ### $P$  < 0.01 versus SNL 7D.  $n$  = 6. (B, C) Representative dot blot analysis (top) showing that SNL (SNL 7D) increased global 5-caC and 5-fC levels in the ipsilateral, but not contralateral, dorsal horn on day 7 after operation compared with sham operation (Sham 7D). Ro 25–6981 (SNL 7D + Ro 25–6981; 100nM, 10  $\mu$ l; once daily on days 3 to 6 after SNL), KN-93 (SNL 7D + KN-93; 50nM, 10  $\mu$ l; once daily on days 3 to 6 after SNL) and Gadd45 $\beta$  mRNA-targeting siRNA (SNL 7D + Gadd45 $\beta$  RNAi; 5  $\mu$ g, 10  $\mu$ l; once daily on days 3 to 6 after SNL) further enhanced the SNL-increased global levels of 5-caC and 5-fC in the ipsilateral dorsal horn. Methylene blue staining (middle) was used to validate equal DNA loading. Statistical analysis (bottom) of the relative intensity of 5-fC and 5-caC in the dot blot analysis in both groups. \* $P$  < 0.05 versus Sham 7D. ### $P$  < 0.01 versus SNL 7D.  $n$  = 6. Data represent mean  $\pm$  SD. DB = dot blotting; Veh = vehicle.

Gadd45 $\beta$  mRNA-targeted siRNA also reversed the SNL-induced enrichment of 5-cytosine at the Ca $_v$ 3.2 promoter, accompanied by an increase in SNL-induced 5-formylcytosine and 5-carboxylcytosine levels.

Moreover, intrathecal administration of a Gadd45 $\beta$  mRNA-targeted siRNA not only ameliorated SNL-associated allodynia but also reduced SNL effects on rearing activity. Though rearing is used as a measure of anxiety and general exploratory behavior, some studies<sup>37,38</sup> suggest rearing activity is a pain-related behavior because it is sensitive to analgesics. Hence, despite our inability to use rearing as a specific index of nonevoked pain behavior, our data at least revealed reduced expression of spinal Gadd45 $\beta$  ameliorated a behavioral change potentially related to the sensory and/or emotional consequences of nerve injury. Altogether, these results imply NR2B, CaMKII, or Gadd45 $\beta$  signaling promotes Ca $_v$ 3.2 promoter demethylation *via* the conversion of 5-formylcytosine and 5-carboxylcytosine to unmethylated 5-cytosine. To the best of our knowledge, our study is the first report that Gadd45 $\beta$  mediates DNA demethylation-dependent epigenetic regulation of the Ca $_v$ 3.2 promoter during neuropathic insult. Therefore, these findings are potentially of considerable benefit to the treatment of chronic neuropathic allodynia.

On the other hand, studies have demonstrated intrathecal delivery of reagents is not only restricted to the dorsal horn neurons at the injection site but also affect DRG neurons.<sup>39</sup> In our study, although the relative magnitude of the changes compared to the sham-operated animals was markedly smaller in the DRG compared with the dorsal horn, SNL up-regulated Gadd45 $\beta$  expression in both the dorsal horn and the DRG, and this was reversed by intrathecal administration of a Gadd45 $\beta$  mRNA-targeted siRNA, indicating Gadd45 $\beta$  in both the dorsal horn and the DRG contributes crucially to the neuropathic allodynia. Therefore, we specifically focused on neuropathic injury-induced changes in the dorsal horn in the current study and observed enhanced expression of Gadd45 $\beta$  and Ca $_v$ 3.2 and phosphorylation of CaMKII and NR2B in the dorsal horn after SNL. More importantly, electrophysiologic recordings from spinal slices revealed a Gadd45 $\beta$ -dependent enhancement of Ca $_v$ 3.2 activity caused by neuropathic injury. Collectively, we conclude Gadd45 $\beta$ -associated plasticity in the dorsal horn plays a role in the development of neuropathic allodynia. Nevertheless, the potential contribution of Gadd45 $\beta$  in the DRG to neuropathic allodynia requires further study.

Growth arrest and DNA-damage-inducible protein 45 family members (*i.e.*, Gadd45a, Gadd45 $\beta$ , and Gadd45g) are drivers of active demethylation.<sup>1</sup> Among them, Gadd45 $\beta$  was recently suggested to be a regulator of plasticity-related genes.<sup>13</sup> Gadd45 $\beta$  is required for the activity-induced DNA demethylation of specific promoters and the expression of corresponding genes critical for neurogenesis and neural activity in hippocampal neurons.<sup>3</sup> Consistently, Gadd45 $\beta$  expression is increased in the mouse hippocampus after

context-exposure learning<sup>40</sup> and fear conditioning.<sup>41</sup> In agreement with these studies linking Gadd45 $\beta$  to forms of activity-dependent plasticity in the brain, our results revealed Gadd45 $\beta$ -mediated demethylation mechanisms also participate in chronic neuropathic allodynia and govern spinal neural plasticity that encodes behavioral hypersensitivity to noxious stimuli. Our findings are supported by work investigating neuropathic nociceptive hypersensitivity mechanisms, which suggests that nociceptive-associated plasticity in spinal neurons relies on molecular processes that are similar to those underlying associative learning, particularly learning- and memory-associated areas such as the hippocampus.<sup>42</sup>

Studies have proposed possible therapeutic effects of NMDAR-specific antagonists for neuropathic pain relief.<sup>43</sup> Our previous reports suggest spinal NR2B-containing NMDARs play an important role in the central sensitization underlying neuropathic allodynia.<sup>14,27</sup> Moreover, Ca $_v$ 3.2, a T-type Ca $^{2+}$  channel, is known to be involved in spinal central sensitization-associated synaptic plasticity,<sup>35,44</sup> making it another novel therapeutic target for neuropathic allodynia. Notably, evidence suggests that NMDAR antagonists reverse Ca $_v$ 3.2 channel-mediated transmission at central synapses.<sup>44</sup> In addition, T-type Ca $^{2+}$  channels coactivated with NR2B-NMDARs induce long-term potentiation at synapses in the thalamorectular area,<sup>45</sup> indicating spinal NR2B or Ca $_v$ 3.2 signaling may play a critical role in neuropathic allodynia. A recent study showed that genetic Gadd45 $\beta$  depletion inhibited Ca $^{2+}$ -induced gene transcription, suggesting that Gadd45 $\beta$  is necessary for this process.<sup>46</sup> The application of agonists specific to the NMDAR, a known Ca $^{2+}$ -permeable ion channel, results in membrane depolarization and therefore increases Gadd45 $\beta$  expression in cultured neurons.<sup>3,41</sup> Furthermore, neurons lacking Gadd45 $\beta$  exhibit reduced DNA demethylation and thus fail to activate crucial neurogenic genes,<sup>3,47</sup> which is essential for the spinal plasticity that underlies persistent pain.<sup>6,7</sup> Consistently, we found that NR2B-containing NMDAR phosphorylation activated Gadd45 $\beta$ -mediated DNA demethylation, which is required for the reactivation of the methylation-silenced Ca $_v$ 3.2 gene in neuropathic nociceptive hypersensitivity. Our findings provide evidence for the novel concept that the phosphorylation of spinal NR2B-containing NMDAR activates Ca $_v$ 3.2 expression and the development of neuropathic allodynia *via* Gadd45 $\beta$ -mediated DNA demethylation at the Ca $_v$ 3.2 promoter.

Calmodulin-dependent protein kinase II contributes to the development of central sensitization by phosphorylating various proteins, including neuronal membrane receptors and intracellular transcription factors.<sup>48</sup> Calmodulin-dependent protein, acting through CaMKII, can regulate the activation of the transcription factor c-Rel.<sup>49</sup> Moreover, a recent study demonstrated that Gadd45 $\beta$ -mediated DNA demethylation in hippocampal neurons was blocked of the c-Rel knockout mice,<sup>50</sup> indicating that Gadd45 $\beta$  is a potential downstream target of c-Rel. Thus, Gadd45 $\beta$  activation in

neurons may be dependent on the well-characterized CaMKII or c-Rel signaling cascade, and the interaction between CaMKII, c-Rel, and Gadd45 $\beta$  in neuropathic pain requires further study to be elucidated.

Tet proteins catalyze the conversion of 5-mC to 5-hmC, and the subsequent oxidation to 5-formylcytosine and 5-carboxylcytosine in what is known as oxidative demethylation, to reactivate methylation-silenced genes at specific genomic loci.<sup>51</sup> Tet overexpression increases 5-hmC but decreases 5-mC enrichment at CpG sites in specific promoters and thus enhances transcription and expression.<sup>52</sup> Formalin injection into the mouse hind paw enhances spinal Tet expression,<sup>22</sup> which further promotes the DNA demethylation to participate in acute inflammatory pain by converting 5-mC to 5-hmC. Additionally, increasing removal of 5-formylcytosine and 5-carboxylcytosine promotes DNA demethylation in Tet overexpressing cells.<sup>24</sup> Consistently, our study found that neuropathic injury enhanced global 5-formylcytosine and 5-carboxylcytosine levels in the dorsal horn. This suggests that SNL promotes DNA demethylation to reactivate methylation-silenced Ca<sub>v</sub>3.2 *via* Tet-dependent catalysis of the conversion of 5-mC to 5-hmC, as well as subsequent oxidation to 5-formylcytosine and 5-carboxylcytosine. These DNA demethylation intermediates are subject to nucleotide excision repair, resulting in a reversion back to unmodified cytosine and thereby the reactivation of methylation-silenced genes at specific genomic loci.<sup>19–21</sup> Intermediates such as 5-formylcytosine and 5-carboxylcytosine are recognized and excised by Gadd45, which results in reversion back to unmodified cytosine, thus completing the active demethylation process.<sup>24</sup> In this study, we observed that SNL significantly increased global 5-formylcytosine and 5-carboxylcytosine levels in the ipsilateral dorsal horn on day 7 postoperation and that these levels were further increased by intrathecal administration of a Gadd45 $\beta$  mRNA-targeted siRNA. SNL also enhanced unmodified 5-cytosine enrichment at the Ca<sub>v</sub>3.2 promoter, which was reduced by intrathecal administration of a Gadd45 $\beta$  mRNA-targeted siRNA. Altogether, these findings characterize the Gadd45 $\beta$ -dependent demethylation of the Ca<sub>v</sub>3.2 promoter, which restores unmodified 5-cytosine by excising increased 5-formylcytosine and 5-carboxylcytosine to mediate the spinal plasticity that underlies nociceptive hypersensitivity. However, the role of Tet family proteins in Gadd45 $\beta$ -related demethylation signaling in neuropathic nociceptive hypersensitivity warrants further study.

Nevertheless, there are limitations to our study. First, to direct use NMDAR- or Ca<sub>v</sub>3.2-targeted antagonists in clinical scenarios for pain relief is quite limited because both NMDARs and Ca<sub>v</sub>3.2 are widely expressed in the human body. Pharmacologic antagonism of these receptors, even if restricted to the CNS, could result in significant side effects as NMDAR-selective antagonists cause serious psychotomimetic effects<sup>53</sup> and the down-regulation of Ca<sub>v</sub>3.2 expression is linked to neurologic diseases such as amyotrophic lateral

sclerosis<sup>54</sup> and absence epilepsy.<sup>55</sup> Moreover, in this study, we pharmacologically antagonized Ca<sub>v</sub>3.2 activity using L-ascorbic acid. In addition to blocking Ca<sub>v</sub>3.2, L-ascorbic acid is shown to function as an antioxidant.<sup>56,57</sup> Thus, whether the amelioration of allodynia by L-ascorbic acid is at least partially attributable to its antioxidative effects warrants further study. Additionally, Gadd45 $\beta$  promotes DNA demethylation at the regulatory regions of brain-derived neurotrophic factor (BDNF) gene,<sup>3,4</sup> which is accompanied by transcriptional activation of BDNF<sup>1,5</sup>; numerous studies have linked BDNF transcription to spinal plasticity underlying neuropathic pain.<sup>7</sup> In the current study, we demonstrated a neuropathic injury-induced spinal Gadd45 $\beta$  expression accompanied by allodynia. Because BDNF is linked to nociception-associated plasticity, the possibility that BDNF acts as the downstream of Gadd45 $\beta$  to mediate neuropathic hypersensitivity through Gadd45 $\beta$ -dependent demethylation of the BDNF gene cannot be excluded.

## Research Support

Supported by grant nos. MOST 105-2628-B-715-003-MY3, MOST 105-2320-B-715-003-MY2, MOST 104-2320-B-715-004-MY3, NSC 102-2628-B-715-001, and NSC 101-2320-B-715-001-MY3 from the Ministry of Science and Technology, Taipei, Taiwan (to Drs. Peng and Ho); grant nos. MMH-MM-10206, MMH-MM-10302, MMH-MM-10403, MMH-MM-10503, and MMH-MM-10608 from the Mackay Memorial Hospital, Taipei, Taiwan (to Dr. Peng); and grant nos. 1001A03, 1001B07, 1011B02, 1021B08, 1031B07, 104B06, and 1042A08 from the Department of Medicine, Mackay Medical College, New Taipei, Taiwan (to Drs. Peng and Ho).

## Competing Interests

The authors declare no competing interests.

## Correspondence

Address correspondence to Dr. Peng: Department of Medicine, Mackay Medical College, No.46, Sec. 3, Zhongzheng Rd, Sanzhi Dist, New Taipei 25245, Taiwan. hsien.yu@gmail.com. Information on purchasing reprints may be found at [www.anesthesiology.org](http://www.anesthesiology.org) or on the masthead page at the beginning of this issue. ANESTHESIOLOGY'S articles are made freely accessible to all readers, for personal use only, 6 months from the cover date of the issue.

## References

- Barreto G, Schäfer A, Marhold J, Stach D, Swaminathan SK, Handa V, Döderlein G, Maltry N, Wu W, Lyko F, Niehrs C: Gadd45a promotes epigenetic gene activation by repair-mediated DNA demethylation. *Nature* 2007; 445:671–5
- Kaufmann LT, Gierl MS, Niehrs C: Gadd45a, Gadd45b and Gadd45g expression during mouse embryonic development. *Gene Expr Patterns* 2011; 11:465–70
- Ma DK, Jang MH, Guo JU, Kitabatake Y, Chang ML, Pow-Anpongkul N, Flavell RA, Lu B, Ming GL, Song H: Neuronal activity-induced Gadd45b promotes epigenetic DNA demethylation and adult neurogenesis. *Science* 2009; 323:1074–7
- lv J, Xin Y, Zhou W, Qiu Z: The epigenetic switches for neural development and psychiatric disorders. *J Genet Genomics* 2013; 40:339–46



5. Wu H, Sun YE: Reversing DNA methylation: New insights from neuronal activity-induced Gadd45b in adult neurogenesis. *Sci Signal* 2009; 2:pe17
6. Miletic G, Hanson EN, Miletic V: Brain-derived neurotrophic factor-elicited or sciatic ligation-associated phosphorylation of cyclic AMP response element binding protein in the rat spinal dorsal horn is reduced by block of tyrosine kinase receptors. *Neurosci Lett* 2004; 361:269–71
7. Constandil L, Aguilera R, Goich M, Hernández A, Alvarez P, Infante C, Pelissier T: Involvement of spinal cord BDNF in the generation and maintenance of chronic neuropathic pain in rats. *Brain Res Bull* 2011; 86:454–9
8. Morelli MB, Liberati S, Amantini C, Santoni M, Nabissi M, Farfariello V, Santoni G: Epigenetic, genetic, and acquired regulation of Cav3 T-type calcium channel expression and function in tumor growth and progression. In: Weiss N, Koschak A, eds. *Pathologies of Calcium Channels*. Berlin, Springer-Verlag Berlin Heidelberg; 2013:277–95
9. Francois A, Schuetter N, Laffray S, Sanguesa J, Pizzoccaro A, Dubel S, Mantilleri A, Nargeot J, Noel J, Wood JN, Moqrich A, Pongs O, Bourinet E: The low-threshold calcium channel Cav3.2 determines low-threshold mechanoreceptor function. *Cell Rep* 2015; 10:370–82
10. Gavin DP, Kusumo H, Sharma RP, Guizzetti M, Guidotti A, Pandey SC: Gadd45b and N-methyl-D-aspartate induced DNA demethylation in postmitotic neurons. *Epigenomics* 2015; 7:567–79
11. Laabich A, Li G, Cooper NG: Characterization of apoptosis-genes associated with NMDA mediated cell death in the adult rat retina. *Brain Res Mol Brain Res* 2001; 91:34–42
12. Katano T, Nakazawa T, Nakatsuka T, Watanabe M, Yamamoto T, Ito S: Involvement of spinal phosphorylation cascade of Tyr1472-NR2B, Thr286-CaMKII, and Ser831-GluR1 in neuropathic pain. *Neuropharmacology* 2011; 60:609–16
13. Liu S, Liu YP, Huang ZJ, Zhang YK, Song AA, Ma PC, Song XJ: Wnt/Ryk signaling contributes to neuropathic pain by regulating sensory neuron excitability and spinal synaptic plasticity in rats. *Pain* 2015; 156:2572–84
14. Peng HY, Chen GD, Lai CY, Hsieh MC, Lin TB: Spinal serum-inducible and glucocorticoid-inducible kinase 1 mediates neuropathic pain via kalirin and downstream PSD-95-dependent NR2B phosphorylation in rats. *J Neurosci* 2013; 33:5227–40
15. Wang G, Bochorishvili G, Chen Y, Salvati KA, Zhang P, Dubel SJ, Perez-Reyes E, Snutch TP, Stornetta RL, Deisseroth K, Erisir A, Todorovic SM, Luo JH, Kapur J, Beenhakker MP, Zhu JJ: Cav3.2 calcium channels control NMDA receptor-mediated transmission: A new mechanism for absence epilepsy. *Genes Dev* 2015; 29:1535–51
16. Welsby PJ, Wang H, Wolfe JT, Colbran RJ, Johnson ML, Barrett PQ: A mechanism for the direct regulation of T-type calcium channels by Ca $_v$ 2+/calmodulin-dependent kinase II. *J Neurosci* 2003; 23:10116–21
17. Naranjo JR, Mellström B: Ca $_v$ 2+-dependent transcriptional control of Ca $_v$ 2+ homeostasis. *J Biol Chem* 2012; 287:31674–80
18. Ziller MJ, Gu H, Muller F, Donaghey J, Tsai LT, Kohlbacher O, De Jager PL, Rosen ED, Bennett DA, Bernstein BE, Gnirke A, Meissner A: Charting a dynamic DNA methylation landscape of the human genome. *Nature* 2013; 500:477–81
19. Bhutani N, Burns DM, Blau HM: DNA demethylation dynamics. *Cell* 2011; 146:866–72
20. Branco MR, Ficz G, Reik W: Uncovering the role of 5-hydroxymethylcytosine in the epigenome. *Nat Rev Genet* 2011; 13:7–13
21. Wu H, Zhang Y: Reversing DNA methylation: Mechanisms, genomics, and biological functions. *Cell* 2014; 156:45–68
22. Pan Z, Zhang M, Ma T, Xue ZY, Li GF, Hao LY, Zhu LJ, Li YQ, Ding HL, Cao JL: Hydroxymethylation of microRNA-365-3p regulates nociceptive behaviors via Kcnh2. *J Neurosci* 2016; 36:2769–81
23. Kigar SL, Chang L, Auger AP: Gadd45b is an epigenetic regulator of juvenile social behavior and alters local pro-inflammatory cytokine production in the rodent amygdala. *Brain Behav Immun* 2015; 46:60–9
24. Li Z, Gu TP, Weber AR, Shen JZ, Li BZ, Xie ZG, Yin R, Guo F, Liu X, Tang F, Wang H, Schär P, Xu GL: Gadd45a promotes DNA demethylation through TDG. *Nucleic Acids Res* 2015; 43:3986–97
25. Zimmermann M: Ethical guidelines for investigations of experimental pain in conscious animals. *Pain* 1983; 16:109–10
26. Lin TB, Hsieh MC, Lai CY, Cheng JK, Wang HH, Chau YP, Chen GD, Peng HY: Melatonin relieves neuropathic allodynia through spinal MT2-enhanced PP2Ac and downstream HDAC4 shuttling-dependent epigenetic modification of hmgb1 transcription. *J Pineal Res* 2016; 60:263–76
27. Lin TB, Lai CY, Hsieh MC, Jiang JL, Cheng JK, Chau YP, Ruan T, Chen GD, Peng HY: Neuropathic allodynia involves spinal neurexin-1 $\beta$ -dependent neuroligin-1/postsynaptic density-95/NR2B cascade in rats. *ANESTHESIOLOGY* 2015; 123:909–26
28. Lin TB, Hsieh MC, Lai CY, Cheng JK, Chau YP, Ruan T, Chen GD, Peng HY: Fbxo3-dependent Fbxl2 ubiquitination mediates neuropathic allodynia through the TRAF2/TNFK/GluR1 cascade. *J Neurosci* 2015; 35:16545–60
29. Abdi S, Lee DH, Park SK, Chung JM: Lack of pre-emptive analgesic effects of local anaesthetics on neuropathic pain. *Br J Anaesth* 2000; 85:620–3
30. Livak KJ, Schmittgen TD: Analysis of relative gene expression data using real-time quantitative PCR and the 2(-Delta Delta C(T)) Method. *Methods* 2001; 25:402–8
31. Shen FY, Chen ZY, Zhong W, Ma LQ, Chen C, Yang ZJ, Xie WL, Wang YW: Alleviation of neuropathic pain by regulating T-type calcium channels in rat anterior cingulate cortex. *Mol Pain* 2015; 11:7
32. Woodbury CJ, Ritter AM, Koerber HR: On the problem of lamination in the superficial dorsal horn of mammals: A reappraisal of the substantia gelatinosa in postnatal life. *J Comp Neurol* 2000; 417:88–102
33. Lai CY, Ho YC, Hsieh MC, Wang HH, Cheng JK, Chau YP, Peng HY: Spinal Fbxo3-dependent Fbxl2 ubiquitination of active zone protein RIM1 $\alpha$  mediates neuropathic allodynia through Cav2.2 activation. *J Neurosci* 2016; 36:9722–38
34. Hsieh MC, Lai CY, Ho YC, Wang HH, Cheng JK, Chau YP, Peng HY: Tet1-dependent epigenetic modification of BDNF expression in dorsal horn neurons mediates neuropathic pain in rats. *Sci Rep* 2016; 6:37411
35. Todorovic SM, Jevtovic-Todorovic V: Neuropathic pain: Role for presynaptic T-type channels in nociceptive signaling. *Pflugers Arch* 2013; 465:921–7
36. Nelson MT, Joksovic PM, Su P, Kang HW, Van Deusen A, Baumgart JP, David LS, Snutch TP, Barrett PQ, Lee JH, Zorumski CF, Perez-Reyes E, Todorovic SM: Molecular mechanisms of subtype-specific inhibition of neuronal T-type calcium channels by ascorbate. *J Neurosci* 2007; 27:12577–83
37. Smiley MM, Lu Y, Vera-Portocarrero LP, Zidan A, Westlund KN: Intrathecal gabapentin enhances the analgesic effects of subtherapeutic dose morphine in a rat experimental pancreatitis model. *ANESTHESIOLOGY* 2004; 101:759–65
38. Hara A, Sakurada T, Sakurada S, Matsumura H, Kisara K: Antinociceptive effects of neonatal capsaicin in rats with adjuvant arthritis. *Naunyn Schmiedeberg Arch Pharmacol* 1984; 326:248–53
39. Luo MC, Zhang DQ, Ma SW, Huang YY, Shuster SJ, Porreca F, Lai J: An efficient intrathecal delivery of small interfering RNA to the spinal cord and peripheral neurons. *Mol Pain* 2005; 1:29
40. Leach PT, Poplawski SG, Kenney JW, Hoffman B, Liebermann DA, Abel T, Gould TJ: Gadd45b knockout mice exhibit selective deficits in hippocampus-dependent long-term memory. *Learn Mem* 2012; 19:319–24

41. Sultan FA, Wang J, Tront J, Liebermann DA, Sweatt JD: Genetic deletion of Gadd45b, a regulator of active DNA demethylation, enhances long-term memory and synaptic plasticity. *J Neurosci* 2012; 32:17059–66
42. Ji RR, Kohno T, Moore KA, Woolf CJ: Central sensitization and LTP: Do pain and memory share similar mechanisms? *Trends Neurosci* 2003; 26:696–705
43. Collins S, Sigtermans MJ, Dahan A, Zuurmond WW, Perez RS: NMDA receptor antagonists for the treatment of neuropathic pain. *Pain Med* 2010; 11:1726–42
44. Wen XJ, Li ZJ, Chen ZX, Fang ZY, Yang CX, Li H, Zeng YM: Intrathecal administration of Cav3.2 and Cav3.3 antisense oligonucleotide reverses tactile allodynia and thermal hyperalgesia in rats following chronic compression of dorsal root of ganglion. *Acta Pharmacol Sin* 2006; 27:1547–52
45. Astori S, Lüthi A: Synaptic plasticity at intrathalamic connections via Cav3.3 T-type Ca<sup>2+</sup> channels and GluN2B-containing NMDA receptors. *J Neurosci* 2013; 33:624–30
46. Sen GL, Reuter JA, Webster DE, Zhu L, Khavari PA: DNMT1 maintains progenitor function in self-renewing somatic tissue. *Nature* 2010; 463:563–7
47. Niehrs C, Schäfer A: Active DNA demethylation by Gadd45 and DNA repair. *Trends Cell Biol* 2012; 22:220–7
48. Fang L, Wu J, Lin Q, Willis WD: Calcium-calmodulin-dependent protein kinase II contributes to spinal cord central sensitization. *J Neurosci* 2002; 22:4196–204
49. Antonsson A, Hughes K, Edin S, Grundström T: Regulation of c-Rel nuclear localization by binding of Ca<sup>2+</sup>/calmodulin. *Mol Cell Biol* 2003; 23:1418–27
50. Jarome TJ, Butler AA, Nichols JN, Pacheco NL, Lubin FD: NF- $\kappa$ B mediates Gadd45 $\beta$  expression and DNA demethylation in the hippocampus during fear memory formation. *Front Mol Neurosci* 2015; 8:54
51. Kaas GA, Zhong C, Eason DE, Ross DL, Vachhani RV, Ming GL, King JR, Song H, Sweatt JD: TET1 controls CNS 5-methylcytosine hydroxylation, active DNA demethylation, gene transcription, and memory formation. *Neuron* 2013; 79:1086–93
52. Wei Y, Melas PA, Wegener G, Mathe AA, Lavebratt C: Antidepressant-like effect of sodium butyrate is associated with an increase in TET1 and in 5-hydroxymethylation levels in the Bdnf gene. *Int J Neuropsychopharmacol* 2015; 18:pyu032
53. Lin JC, Chan MH, Lee MY, Chen YC, Chen HH: N,N-dimethylglycine differentially modulates psychotomimetic and antidepressant-like effects of ketamine in mice. *Prog Neuropsychopharmacol Biol Psychiatry* 2016; 71:7–13
54. Rzhetsky Y, Lazniewska J, Blesneac I, Pamphlett R, Weiss N: CACNA1H missense mutations associated with amyotrophic lateral sclerosis alter Cav3.2 T-type calcium channel activity and reticular thalamic neuron firing. *Channels (Austin)* 2016; 10:466–77
55. Sharop BR, Boldyrev OI, Batiuk MY, Shtefan NL, Shuba YM: Compensatory reduction of Cav3.1 expression in thalamocortical neurons of juvenile rats of WAG/Rij model of absence epilepsy. *Epilepsy Res* 2016; 119:10–2
56. Wang WG, Xiu RJ, Xu ZW, Yin YX, Feng Y, Cao XC, Wang PS: Protective effects of vitamin C against spinal cord injury-induced renal damage through suppression of NF- $\kappa$ B and proinflammatory cytokines. *Neurol Sci* 2015; 36:521–6
57. Shaik-Dasthagirisahab YB, Varvara G, Murmura G, Saggini A, Caraffa A, Antinolfi P, Tete' S, Tripodi D, Conti F, Cianchetti E, Toniato E, Rosati M, Speranza L, Pantalone A, Saggini R, Tei M, Speziali A, Conti P, Theoharides TC, Pandolfi F: Role of vitamins D, E and C in immunity and inflammation. *J Biol Regul Homeost Agents* 2013; 27:291–5
